# Supplementary material
Source: publisher site journal article supplement (https://static.cambridge.org/content/id/urn:cambridge.org:id:article:S1047951120001985/resource/name/S1047951120001985supp001.csv)
Supplement: Supplementary file 1 [file S1047951120001985supp001.csv]

Patient ID	PLE	Onset of PLE post Fontan	Heterotaxy	Type of single ventricle	Age at Fontan (years)	Duration of follow up (years) From date of Fontan until last discharge/last CERNER note	Status at last follow up death 1, alive: 2 or transplant: 3, HOSPICE, HOME : 4	ETHNIC ORIGIN	Gender	type of fontan	Fenestration performed	Number of encounterss	Hospital LOS	CICU LOS	Albumin-25% infusion	Any ACE inhibitor	Enalapril	Captopril	Calcium	Any PAH medication	Tadalafil	Sildenfil	Budesonide	Ambrisentan	Bosentan	Any anticoagulant	Asprin	Clopidogril (Pla	Heparin	Warfarin	Digoxin	Any diuretic	Furosomide	Spironolactone	Hyrdonlorothiazi	Hydrochl..spiron	Any drip	Dubutamine	Dopamine	Norepinephrine	Epinephrine	Vasopresson	Milrinone	Carvedilol	TOTAL Chrgs	Estimated total cost	OPERATING Costs
	0:No,1:yes	years	1:yes, 0: No	1- Hypoplastic left heart with aortic and mitral atresia, 2- Hypoplastic left heart with aortic atresia and mitral stenosis, 3- Hypoplastic left heart with aortic hypoplasia and mitral atresia 4- Hypoplastic left heart with aortic and mitral hypoplasia, 5- Double inlet left ventricle, 6- Double outlet right ventricle, 7- Unbalanced AV canal, 8- Double outlet right ventricle with left-sided hypopl…	years	years	death 1, alive: 2 or transplant: 3, HOSPICE, HOME : 4	3: Black, 4: Caucasian, 5: others	Male:0, Female:1	1: Intra/extra cardiac fontan, 2: Extra cardiac fontan, 3: Lateral fontan, 4: Others	1:yes, 0: No																																		2018 US dollar	Ratio-cost-to-charge	2018 US dollar
1	1	0.339726027	0	5	15.44383562	2.821917808	2	3	1	1	1	26	2	0	0	0	0	0	0	0	0	0	0	0	0	1	1	0	0	0	1	1	1	0	0	0	0	0	0	0	0	0	0	0	16379	5425.625645	2950.888
1													3	0	1	0	0	0	0	0	0	0	0	0	0	1	1	0	0	0	1	1	1	1	0	0	0	0	0	0	0	0	0	0	33760	11183.1688	5859.256
1													0	0	0	0	0	0	0	0	0	0	0	0	0	0	0	0	0	0	0	0	0	0	0	0	0	0	0	0	0	0	0	0	3585	1091.56797	363.3
1													2	0	1	0	0	0	0	0	0	0	0	0	0	1	1	0	0	0	1	1	1	1	0	0	0	0	0	0	0	0	0	0	15382	4683.542124	2811.9
1													6	0	1	0	0	0	0	1	1	0	0	0	0	1	1	0	1	0	1	1	1	1	0	0	0	0	0	0	0	0	0	0	81718	24881.66008	19503.75
1													0	0	0	0	0	0	0	0	0	0	0	0	0	0	0	0	0	0	0	0	0	0	0	0	0	0	0	0	0	0	0	0	2394	728.929908	305.55
1													2	0	1	0	0	0	0	1	1	0	0	0	0	1	1	0	0	0	1	1	1	1	0	0	0	0	0	0	0	0	0	0	19406	5908.777692	3505.95
1													3	0	1	0	0	0	0	1	1	0	0	0	0	1	1	0	0	0	1	1	1	1	0	0	0	0	0	0	0	0	0	0	30055	9151.20651	5687.85
1													3	0	1	0	0	0	0	1	1	0	0	0	0	1	1	0	0	0	1	1	1	1	0	0	0	0	0	0	0	0	0	0	27092	8249.026344	5408.55
1													3	0	1	0	0	0	0	1	1	0	0	0	0	1	1	0	0	0	1	1	1	1	0	0	0	0	0	0	0	0	0	0	27154	8267.904228	5314.05
1													1	0	1	0	0	0	0	1	1	0	1	0	0	1	1	0	0	0	1	1	1	1	0	0	0	0	0	0	0	0	0	0	13093	3986.582826	2324.7
1													1	0	1	0	0	0	0	1	1	0	1	0	0	1	1	0	0	0	1	1	1	1	0	0	0	0	0	0	0	0	0	0	16146	4916.166372	3608.85
1													7	0	1	0	0	0	0	1	1	0	1	0	0	1	1	0	1	0	1	1	1	1	0	0	1	0	0	0	1	0	0	0	91295	27576.5677	20634.016
1													2	0	1	0	0	0	0	1	1	0	1	0	0	1	1	0	0	0	1	1	1	1	0	0	0	0	0	0	0	0	0	0	139629	42176.33574	3018.208
1													2	0	1	0	0	0	0	1	1	0	1	0	0	1	1	0	0	0	1	1	1	1	0	0	1	0	0	0	1	0	0	0	33806	10211.44036	7278.24
1													2	0	1	0	0	0	0	1	1	0	1	0	0	1	1	0	0	0	1	1	1	1	0	0	0	0	0	0	0	0	0	0	20796.44	6281.772666	3982.472
1													1	0	1	0	0	0	0	1	1	0	1	0	0	1	1	0	0	0	1	1	1	1	0	0	0	0	0	0	0	0	0	0	11552.664	3489.597688	2314.028
1													5	0	1	0	0	0	0	1	1	0	1	0	0	1	1	0	0	0	1	1	1	1	0	0	0	0	0	0	0	0	0	0	50205.464	15165.06246	10389.996
1													6	0	1	0	0	0	0	1	1	0	1	0	0	1	1	0	0	0	1	1	1	1	0	0	0	0	0	0	0	0	0	0	67025.6	20245.75274	14577.04
1													5	0	1	0	0	0	0	1	1	0	1	0	0	1	1	0	0	0	1	1	1	1	0	0	0	0	0	0	0	0	0	0	62265.96	18808.05588	13312.6
1													4	0	1	0	0	0	0	1	1	0	1	0	0	1	1	0	0	0	1	1	1	1	0	0	0	0	0	0	0	0	0	0	59892.308	18091.07055	12355.532
1													46	8	1	0	0	0	1	1	1	0	1	0	0	1	1	0	1	0	1	1	1	1	0	0	1	0	1	0	1	1	1	0	889778.204	268766.4043	275415.592
1													2	0	1	0	0	0	0	1	1	0	1	0	0	0	0	0	0	0	0	1	1	0	0	0	0	0	0	0	0	0	0	0	23114.58	6981.990035	4117.14
1													2	0	0	0	0	0	0	1	1	0	1	0	0	1	0	0	1	0	0	0	0	0	0	0	0	0	0	0	0	0	0	0	33139.636	10010.15845	6869.096
1													1	0	1	0	0	0	0	1	1	0	1	0	0	0	0	0	0	0	0	1	1	0	0	0	0	0	0	0	0	0	0	0	20394.492	6160.360254	3704.912
1													12	1	0	0	0	0	0	1	1	0	1	0	0	1	0	0	1	0	0	1	1	0	0	0	1	0	0	0	1	0	0	0	145229.672	43868.07472	28237.104
2	1	12.55890411	0	11	3.101369863	14.93972603	2	3	1	2	1	15	2	1	0	1	1	0	0	0	0	0	0	0	0	1	1	0	0	0	1	1	0	1	0	0	0	0	0	0	0	0	0	0	29452.04	11168.6259	4939.33
2													4	3	0	1	1	0	0	0	0	0	0	0	0	1	1	0	0	1	1	1	0	1	0	0	1	0	0	0	1	0	0	0	52933.695	19149.39937	10222.935
2													2	0	0	1	1	0	0	0	0	0	0	0	0	1	1	0	0	1	1	1	0	1	0	0	0	0	0	0	0	0	0	0	9309.165	3367.702149	2250.345
2													0	0	0	0	0	0	0	0	0	0	0	0	0	0	0	0	0	0	0	0	0	0	0	0	0	0	0	0	0	0	0	0	2645.46	957.0269005	316.305
2													0	0	0	1	1	0	0	0	0	0	0	0	0	1	1	0	0	1	0	1	1	1	0	0	0	0	0	0	0	0	0	0	65868.795	21819.36769	14229.318
2													0	0	0	0	0	0	0	0	0	0	0	0	0	0	0	0	0	0	0	0	0	0	0	0	0	0	0	0	0	0	0	0	2444.9	809.8853495	322.089
2													2	0	1	1	1	0	0	0	0	0	0	0	0	1	1	0	0	1	1	1	1	1	0	0	0	0	0	0	0	0	0	0	23865.413	7905.537383	3886.328
2													10	0	1	1	1	0	1	0	0	0	0	0	0	0	0	0	0	0	1	1	1	1	0	0	0	0	0	0	0	0	0	0	74287.755	24608.19028	15530.43
2													37	3	1	1	1	0	1	1	0	0	1	0	0	1	1	0	0	0	1	1	1	1	0	0	1	0	1	0	1	0	0	0	421457.177	139609.7972	88688.216
2													2	0	1	1	1	0	1	0	0	0	0	0	0	1	1	0	0	0	1	1	1	1	0	0	0	0	0	0	0	0	0	0	20735.941	6868.884136	3950.108
2													5	1	1	0	0	0	1	1	0	0	1	0	0	1	1	0	0	0	1	1	1	1	0	0	1	0	1	0	1	0	0	0	76213.911	25246.23909	13893.41
2													1	0	1	1	1	0	1	1	0	0	1	0	0	1	1	0	0	0	1	1	1	1	0	0	0	0	0	0	0	0	0	0	8221.5	2503.298763	1677.9
2													2	0	1	1	1	0	1	1	0	1	1	0	0	1	1	0	1	0	1	1	1	1	0	0	0	0	0	0	0	0	0	0	49240.8	14992.93727	12525.45
2													0	0	0	0	0	0	0	0	0	0	0	0	0	0	0	0	0	0	0	0	0	0	0	0	0	0	0	0	0	0	0	0	4265.172	1288.337854	488.3
2													1	0	0	1	1	0	1	1	0	1	1	0	0	1	1	0	0	1	1	1	0	1	0	0	0	0	0	0	0	0	0	0	14981.044	4525.174151	2362.344
3	1	5.252054795	0	11	2.893150685	12.21917808	4	3	0	3	1	16	0	0	1	0	0	0	0	0	0	0	0	0	0	0	0	0	0	0	0	1	1	0	0	0	0	0	0	0	0	0	0	0	2346.475	1048.494196	588.675
3													2	0	1	1	1	0	0	0	0	0	0	0	0	0	0	0	0	0	1	1	1	1	0	0	0	0	0	0	0	0	0	0	18351.2	7419.261702	3357.76
3													3	0	1	1	1	0	0	1	0	0	1	0	0	0	0	0	0	0	1	1	1	1	0	0	0	0	0	0	0	0	0	0	26565.28	10740.15675	5091.52
3													12	4	1	1	1	0	1	0	0	0	0	0	0	1	1	0	0	0	1	1	1	1	0	0	1	0	0	0	1	0	0	0	154725.76	11168.6259	30618.56
3													9	0	1	1	1	0	1	1	0	0	1	0	0	1	1	0	0	0	1	1	1	1	0	0	0	0	0	0	0	0	0	0	80045.298	28924.44848	16860.888
3													0	0	1	1	1	0	1	1	0	0	1	0	0	1	1	0	0	0	1	1	1	1	0	0	0	0	0	0	0	0	0	0	22306.968	8060.645194	3896.802
3													17	16	1	1	1	0	1	1	0	0	1	0	0	1	1	0	1	1	1	1	1	1	0	0	1	0	1	0	1	0	1	0	344128.572	124351.2036	64735.884
3													4	0	1	1	1	0	1	1	0	1	1	0	0	1	1	0	0	0	1	1	1	1	0	0	0	0	0	0	0	0	0	0	34226.856	12367.90864	7306.092
3													4	0	1	1	1	0	1	1	0	1	1	0	0	1	1	0	0	0	1	1	1	1	0	0	0	0	0	0	0	0	0	0	39346.83	14218.01637	8051.634
3													14	0	1	1	1	0	1	1	0	1	0	0	0	1	1	0	0	0	1	1	1	1	0	0	0	0	0	0	0	0	0	0	112999.572	40832.50834	24933.384
3													3	0	0	1	1	0	1	1	0	1	0	0	0	1	1	0	0	0	1	1	1	1	0	0	0	0	0	0	0	0	0	0	20950.766	7944.823778	4661.256
3													20	14	0	1	1	0	1	1	0	1	0	0	0	1	1	0	0	0	1	1	1	1	0	0	1	0	1	0	1	0	1	0	445138.046	168802.579	84604.826
3													11	5	1	1	1	0	1	1	0	1	0	0	0	1	1	0	0	0	0	1	1	1	0	0	1	0	0	0	1	0	0	0	139078.116	52740.36868	28116.852
3													0	0	0	0	0	0	0	0	0	0	0	0	0	0	0	0	0	0	0	0	0	0	0	0	0	0	0	0	0	0	0	0	2279.774	864.5222176	292.14
3													27	23	1	1	1	0	1	1	0	1	0	0	0	1	1	0	0	0	0	1	1	1	0	0	1	0	1	0	1	0	1	0	604470.57	218674.4823	114258.525
3													14	0	1	0	0	0	1	1	0	1	0	0	0	1	1	0	0	0	0	1	1	1	1	0	0	0	0	0	0	0	0	0	143477.362	47527.59355	29001.829
4	1	0.430136986	0	6	2.320547945	10.03287671	3	5	0	2	1	30	6	0	1	1	1	0	1	0	0	0	0	0	0	1	1	0	0	0	0	1	1	1	0	0	0	0	0	0	0	0	0	0	90328.125	40362.03872	21131.2
4													2	0	1	0	0	0	1	1	0	0	1	0	0	1	1	0	0	0	0	1	0	1	0	0	0	0	0	0	0	0	0	0	23339.475	8443.335155	3794.595
4													4	0	1	0	0	0	1	0	0	0	0	0	0	1	1	0	0	0	0	1	1	1	0	0	0	0	0	0	0	0	0	0	26438.625	9564.489857	5559.3
4													2	0	1	0	0	0	1	1	0	0	1	0	0	1	1	0	0	0	0	1	1	1	0	0	0	0	0	0	0	0	0	0	19300.995	6982.366553	3720.045
4													0	0	0	0	0	0	1	0	0	0	0	0	0	1	0	1	0	0	0	1	1	1	0	0	1	0	0	0	1	0	0	0	60840.255	22009.69233	13111.215
4													9	0	1	0	0	0	1	1	0	0	1	0	0	1	1	0	0	0	0	1	1	1	0	0	0	0	0	0	0	0	0	0	78290.28	28322.44827	15428.655
4													4	0	1	0	0	0	1	1	0	0	1	0	0	1	1	0	0	0	0	1	1	1	0	0	0	0	0	0	0	0	0	0	41714.246	13818.05256	7484.583
4													4	0	1	0	0	0	1	1	0	0	1	0	0	1	1	0	0	0	0	1	1	1	0	0	0	0	0	0	0	0	0	0	31218.184	10341.17954	6085.675
4													2	0	1	0	0	0	1	1	0	0	1	0	0	1	1	0	0	0	0	1	1	1	0	0	0	0	0	0	0	0	0	0	14391.957	4767.407716	3130.535
4													0	0	0	0	0	0	1	1	0	0	1	0	0	1	1	0	0	0	0	1	1	1	0	0	0	0	0	0	0	0	0	0	38681.507	12813.4426	7184.817
4													2	0	1	0	0	0	1	1	0	0	1	0	0	1	1	0	0	0	0	1	1	1	0	0	0	0	0	0	0	0	0	0	30521.919	10110.53828	5292.677
4													2	0	1	0	0	0	1	1	0	0	1	0	0	1	1	0	0	0	0	1	1	1	0	0	0	0	0	0	0	0	0	0	26791.852	8874.934934	4819.642
4													2	0	1	0	0	0	1	1	0	0	1	0	0	1	1	0	0	0	0	1	1	1	0	0	0	0	0	0	0	0	0	0	14927.709	4944.878245	3166.677
4													20	7	1	0	0	0	1	1	0	1	1	0	0	1	1	0	0	0	0	1	1	1	0	0	1	0	1	0	1	0	1	0	243303.692	80595.56449	50093.875
4													1	0	0	0	0	0	1	1	0	0	1	0	0	1	1	0	0	0	0	1	1	1	0	0	0	0	0	0	0	0	0	0	5555.238	1840.200364	1320.246
4													1	0	1	0	0	0	1	1	0	0	1	0	0	1	1	0	0	0	0	1	1	1	0	0	1	0	0	0	0	0	1	0	12228.752	4050.835244	2248.245
4													170	110	1	0	0	0	1	1	0	1	0	0	0	1	0	0	1	0	1	1	1	1	0	0	1	0	1	0	1	1	1	0	4191319.65	1276181.39	1106935.2
4													0	0	0	0	0	0	0	0	0	0	0	0	0	1	0	0	1	0	0	0	0	0	0	0	0	0	0	0	0	0	0	0	27172.95	8273.674162	5472.6
4													3	0	1	0	0	0	1	1	0	1	0	0	0	0	0	0	0	0	0	0	0	0	0	0	0	0	0	0	0	0	0	0	34315.05	10448.31505	9930.9
4													3	0	1	0	0	0	1	1	0	1	0	0	0	1	0	0	1	0	0	0	0	0	0	0	0	0	0	0	0	0	0	0	65319.45	19888.59677	21733.95
4													2	0	1	0	0	0	1	1	0	1	0	0	0	1	0	0	1	0	0	0	0	0	0	0	0	0	0	0	0	0	0	0	31010.7	9442.199957	5458.95
4													2	1	1	0	0	0	1	1	0	1	0	0	0	0	0	0	0	0	0	0	0	0	0	0	1	0	0	0	1	0	0	0	43969.8	13388.01264	13971.3
4													41	10	1	0	0	0	1	1	0	1	1	0	0	1	0	0	1	0	0	1	1	0	0	0	1	0	1	0	1	0	0	0	770828.1	234703.2815	203018.55
4													33	0	1	0	0	0	1	1	0	0	1	0	0	1	0	0	1	0	0	1	1	0	0	0	0	0	0	0	0	0	0	0	465257.1	141662.4123	93726.15
4													33	2	1	0	0	0	1	1	0	0	1	0	0	0	0	0	0	0	0	1	1	0	0	0	1	0	1	0	0	0	0	0	475423.272	143606.3535	91778.812
4													18	2	1	0	0	0	1	1	0	0	1	0	0	0	0	0	0	0	0	1	1	0	0	0	0	0	0	0	0	0	0	0	255991.532	77324.80216	50883.944
4													22	4	1	0	0	0	1	1	0	0	1	0	0	1	0	0	1	0	0	1	1	0	0	0	1	0	0	0	1	0	0	0	374275.268	113053.5875	73946.096
4													2	0	1	0	0	0	1	1	0	0	1	0	0	0	0	0	0	0	0	1	1	0	0	0	0	0	0	0	0	0	0	0	46843.904	14149.66964	7466.364
4													0	0	0	0	0	0	0	0	0	0	0	0	0	0	0	0	0	0	0	0	0	0	0	0	0	0	0	0	0	0	0	0	3584.636	1082.77515	409.144
4													0	0	1	0	0	0	1	1	0	0	1	0	0	1	0	0	1	0	0	1	1	0	0	0	1	0	0	0	1	0	0	0	40441.52	12215.76553	9897.584
5	1	3.208219178	0	11	2.134246575	12.03561644	2	3	1	3	1	18	1	0	1	0	0	0	0	0	0	0	0	0	0	1	1	0	0	0	0	1	1	1	0	0	0	0	0	0	0	0	0	0	10607.52	4288.546083	1831.2
5													0	0	0	0	0	0	0	0	0	0	0	0	0	0	0	0	0	0	0	0	0	0	0	0	0	0	0	0	0	0	0	0	19535.04	7897.879927	3564.96
5													2	0	1	1	1	0	0	0	0	0	0	0	0	1	1	0	0	0	0	1	1	1	0	0	0	0	0	0	0	0	0	0	13122.735	4346.971582	2886.045
5													4	0	1	1	1	0	0	1	0	0	1	0	0	1	1	0	0	0	0	1	1	1	0	0	0	0	0	0	0	0	0	0	45822.741	15179.01207	9264.045
5													4	0	1	1	1	0	0	1	0	0	1	0	0	1	1	0	0	0	0	1	1	1	0	0	0	0	0	0	0	0	0	0	45822.741	15179.01207	9102.469
5													1	0	1	1	1	0	0	1	0	0	1	0	0	1	1	0	0	0	0	1	1	1	0	0	0	0	0	0	0	0	0	0	14911.764	4939.596384	3603.57
5													0	0	0	1	1	0	0	0	0	0	0	0	0	0	0	0	0	0	0	1	0	1	0	0	0	0	0	0	0	0	0	0	26014.799	8617.532243	4846.217
5													2	0	1	1	1	0	0	0	0	0	0	0	0	1	1	0	0	0	0	1	1	1	0	0	0	0	0	0	0	0	0	0	21058.8	6412.025542	3664.5
5													1	0	1	1	1	0	0	1	0	0	1	0	0	1	1	0	0	0	0	1	1	1	0	0	0	0	0	0	0	0	0	0	8553.3	2604.325891	1926.75
5													0	0	1	1	1	0	0	1	0	1	1	0	0	1	1	0	0	0	0	1	1	1	0	0	0	0	0	0	0	0	0	0	14833.012	4480.459605	1905.912
5													0	0	0	0	0	0	0	0	0	0	0	0	0	1	0	0	1	0	0	0	0	0	0	0	1	0	1	0	1	0	0	0	28743.908	8682.38485	5383.636
5													3	0	1	1	1	0	0	1	0	1	1	0	0	1	1	0	0	0	0	1	1	1	0	0	1	0	0	0	1	0	0	0	38138.8	11520.20593	7848.78
5													3	0	1	1	1	0	0	1	0	1	1	0	0	1	1	0	0	0	0	1	1	1	0	0	0	0	0	0	0	0	0	0	29692.752	8968.992669	5092.712
5													0	0	0	0	0	0	0	0	0	0	0	0	0	0	0	0	0	0	0	0	0	0	0	0	0	0	0	0	0	0	0	0	2850.644	861.0655266	376.248
5													0	0	0	1	1	0	0	1	0	1	0	0	0	1	0	0	1	0	0	1	1	1	0	0	1	0	1	0	1	0	0	0	23272.892	7029.809758	4059.572
5													2	0	1	1	1	0	0	1	0	1	1	0	0	1	1	0	0	0	0	1	1	1	0	0	0	0	0	0	0	0	0	0	32259.668	9744.355316	5951.092
5													2	0	1	1	1	0	0	1	0	1	1	0	0	1	1	0	0	0	0	1	1	1	0	0	0	0	0	0	0	0	0	0	23499.052	7098.123647	4767.864
5													7	1	1	1	1	0	1	1	0	1	1	0	0	1	1	0	1	0	0	1	1	1	0	0	1	0	1	0	1	0	0	0	136297.38	41169.9866	25209.644
6	1	9.202739726	1	11	2.178082192	12.07123288	2	4	1	2	1	10	0	0	0	1	1	0	0	0	0	0	0	0	0	0	0	0	0	0	0	0	0	0	0	0	0	0	0	0	0	0	0	0	57640.995	20852.32163	11779.965
6													2	2	0	1	1	0	0	0	0	0	0	0	0	0	0	0	0	0	0	0	0	0	0	0	0	0	0	0	0	0	0	0	31239.645	11301.31645	6658.38
6													6	0	0	1	1	0	0	0	0	0	0	0	0	0	0	0	0	0	0	0	0	0	0	0	0	0	0	0	0	0	0	0	57972.21	20972.14263	11489.22
6													2	0	0	1	1	0	0	0	0	0	0	0	0	0	0	0	0	0	0	0	0	0	0	0	0	0	0	0	0	0	0	0	20454.39	7399.621035	3648.69
6													5	0	1	1	1	0	0	0	0	0	0	0	0	1	1	0	0	0	0	1	1	1	0	0	0	0	0	0	0	0	0	0	49409.303	16367.07867	9480.897
6													0	0	0	0	0	0	0	0	0	0	0	0	0	0	0	0	0	0	0	0	0	0	0	0	1	0	0	0	1	0	0	0	36450.27	12074.33419	6787.255
6													0	0	0	0	0	0	0	0	0	0	0	0	0	1	0	0	1	0	0	0	0	0	0	0	0	0	0	0	0	0	0	0	53280.15	16222.84663	11317.95
6													1	1	0	1	1	0	0	0	0	0	0	0	0	1	1	0	0	0	0	1	0	1	0	0	1	0	0	0	1	0	0	0	20036.1	6100.6318	3291.75
6													2	0	0	0	0	0	0	0	0	0	0	0	0	1	1	0	0	0	0	1	0	1	0	0	0	0	0	0	0	0	0	0	10603.82	3202.989869	2487.76
6													0	0	0	0	0	0	0	0	0	0	0	0	0	1	1	0	0	0	0	0	0	0	0	0	0	0	0	0	0	0	0	0	8069.8	2437.563788	1961.424
7	1	2.082191781	0	2	2.068493151	6.843835616	2	5	1	2	1	10	1	0	1	1	1	0	1	1	0	0	1	0	0	1	1	0	0	0	0	1	1	1	0	0	0	0	0	0	0	0	0	0	5379.15	2403.608628	1316
7													0	0	1	1	1	0	0	0	0	0	0	0	0	1	1	0	0	0	0	1	1	1	0	0	0	0	0	0	0	0	0	0	4902.1	2190.44456	1131.525
7													1	0	1	1	1	0	0	0	0	0	0	0	0	1	1	0	0	0	0	1	1	1	0	0	0	0	0	0	0	0	0	0	8592.775	3839.578395	1863.55
7													0	0	0	1	1	0	0	0	0	0	0	0	0	1	1	0	0	0	0	1	1	1	0	0	1	0	0	0	1	0	0	0	31347.252	11687.41539	8796.004
7													6	3	0	1	1	0	1	1	0	0	1	0	0	1	1	0	0	0	0	1	1	1	0	0	1	0	0	0	1	0	0	0	87831.724	32746.91648	16069.556
7													2	0	1	1	1	0	0	1	0	0	1	0	0	1	0	0	0	1	0	1	0	1	0	0	0	0	0	0	0	0	0	0	14781.772	5511.191527	3160.504
7													0	0	0	1	1	0	1	0	0	0	0	0	0	0	0	0	0	0	0	1	1	1	0	0	1	0	1	0	0	0	0	0	25121.036	9366.051699	4633.248
7													19	6	1	1	1	0	1	0	0	0	0	0	0	1	0	0	0	1	0	1	1	1	0	0	1	0	1	0	1	0	0	0	222372.64	89903.70174	43643.04
7													1	0	0	1	1	0	1	0	0	0	0	0	0	1	1	0	0	1	0	1	1	1	0	0	1	0	0	0	1	0	0	0	26816.16	10841.58577	4222.4
7													3	1	1	1	1	0	1	0	0	0	0	0	0	1	0	0	0	1	0	1	1	1	0	0	0	0	0	0	0	0	0	0	19663.84	7949.952865	4193.28
8	1	3.101369863	0	5	13.63287671	4.942465753	2	5	1	1	1	4	4	1	0	0	0	0	0	0	0	0	0	0	0	1	1	0	0	1	1	1	1	1	0	0	0	0	0	0	0	0	0	0	69201.625	30921.91571	18803.525
8													6	0	0	0	0	0	0	0	0	0	0	0	0	1	1	0	0	1	1	1	1	1	0	0	1	0	1	0	0	0	0	0	51268.6	19114.83102	11867.496
8													26	10	1	0	0	0	1	0	0	0	0	0	0	1	0	0	1	1	1	1	1	1	0	0	1	0	1	1	1	0	1	0	518484.96	209619.8399	97107.36
8													4	0	0	0	0	0	0	0	0	0	0	0	0	1	0	0	0	1	1	1	0	1	0	0	0	0	0	0	0	0	0	0	32149.6	12997.85823	7477.12
9	1	0.419178082	0	1	3.016438356	8.005479452	1	5	0	3	1	1	1	0	1	0	0	0	1	0	0	0	0	0	0	0	0	0	0	0	0	0	0	0	0	0	0	0	0	0	0	0	0	0	18863.25	5743.520087	3631.95
10	1	4.323287671	0	5	2.38630137	2.805479452	2	3	0	1	1	3	2	0	0	0	0	0	0	0	0	0	0	0	0	1	1	0	0	0	0	0	0	0	0	0	0	0	0	0	0	0	0	0	19287.86	7191.227859	3361.648
10													5	1	0	1	1	0	0	0	0	0	0	0	0	1	1	0	0	0	0	1	1	1	0	0	0	0	0	0	0	0	0	0	33610.7	12531.31256	7591.452
10													0	0	0	1	1	0	0	0	0	0	0	0	0	1	1	0	0	0	0	1	1	1	0	0	0	0	0	0	0	0	0	0	33340.16	13479.19331	8973.44
11	1	1.194520548	0	11	1.78630137	1.698630137	2	3	0	3	1	3	10	6	0	1	1	0	1	0	0	0	0	0	0	0	0	0	0	0	0	1	1	1	0	0	1	0	1	0	1	0	1	0	285302.925	127484.1884	55623.325
11													7	4	0	1	1	0	0	0	0	0	0	0	0	0	0	0	0	0	0	1	1	1	0	0	0	0	0	0	0	0	0	0	90704.384	33817.95042	16348.152
11													3	1	0	1	1	0	0	0	0	0	0	0	0	1	1	0	0	0	0	1	1	0	0	0	0	0	0	0	0	0	0	0	30526.492	11381.4057	5449.384
12	1	0.076712329	0	6	1.734246575	0.457534247	1	5	0	3	1	2	2	0	0	1	1	0	0	0	0	0	0	0	0	1	1	0	0	0	0	1	1	1	0	0	0	0	0	0	0	0	0	0	16762.55	7490.144317	3173.675
12													105	45	1	1	1	0	1	1	0	1	0	0	0	1	1	0	1	0	0	1	1	1	0	0	1	1	1	1	1	0	1	0	1437034.4	642121.5772	281499.45
13	1	27.26849315	1	5	11.81369863	31.29041096	2	4	0	4	0	61	2	2	0	0	0	0	0	0	0	0	0	0	0	1	1	0	0	1	0	1	1	0	0	0	1	1	0	0	0	0	0	1	26045.05	11637.91805	4409.775
13													4	2	0	0	0	0	0	0	0	0	0	0	0	1	1	0	0	1	0	1	1	0	0	0	1	1	1	0	1	0	1	1	92560.625	41359.60455	22468.35
13													2	1	0	0	0	0	1	1	0	1	0	0	0	1	1	0	0	1	0	1	1	0	0	0	1	1	0	0	1	0	0	1	28302.348	10552.16252	5234.368
13													1	1	0	0	0	0	0	1	0	1	0	0	0	1	1	0	0	1	0	1	1	0	0	0	0	0	0	0	0	0	0	1	11857.092	4420.76261	1951.328
13													0	0	0	0	0	0	0	0	0	0	0	0	0	0	0	0	0	0	0	0	0	0	0	0	1	0	0	0	1	0	0	0	7240.028	2699.350319	1102.824
13													6	6	0	0	0	0	0	1	0	1	0	0	0	1	1	0	1	1	0	1	1	0	0	0	1	1	1	1	1	0	0	1	129763.312	48380.56396	25947.576
13													5	4	0	0	0	0	1	1	0	1	0	0	0	1	0	0	0	1	0	1	1	0	0	0	1	0	1	0	1	0	0	1	104181.032	38842.54343	23209.012
13													2	0	0	0	0	0	0	1	0	1	0	0	0	1	1	0	0	1	0	1	1	0	0	0	0	0	0	0	0	0	0	1	14780.64	5975.709288	2871.68
13													11	9	1	0	0	0	0	1	0	1	1	0	0	1	1	0	0	1	0	1	1	0	0	0	1	1	0	0	0	0	0	1	131677.28	53236.20256	28677.6
13													5	0	0	0	0	0	0	1	0	1	0	0	0	1	1	0	0	1	0	1	1	0	0	0	0	0	0	0	0	0	0	1	27843.2	11256.81086	6455.68
13													5	5	1	0	0	0	0	1	0	1	0	0	0	1	1	0	0	1	0	1	1	0	0	0	1	1	1	0	0	0	0	1	66689.28	26962.00908	14427.84
13													0	0	0	0	0	0	0	1	0	1	0	0	0	0	0	0	0	0	0	1	1	0	0	0	0	0	0	0	0	0	0	1	7246.4	2929.668795	1165.92
13													2	2	1	0	0	0	0	1	0	1	0	0	0	1	1	0	0	1	0	1	1	0	0	0	1	1	0	0	0	0	0	1	44097.76	17828.41568	8365.28
13													4	4	1	0	0	0	0	1	0	1	0	0	0	1	1	0	0	1	0	1	1	0	0	0	1	1	0	0	0	0	0	1	52996.16	21425.97651	10688.16
13													5	5	1	0	0	0	0	1	0	1	0	0	0	1	1	0	0	1	0	1	1	0	1	0	1	1	0	0	0	0	0	1	76058.08	30749.74934	14295.68
13													4	4	0	0	0	0	1	1	0	1	0	0	0	1	1	0	0	1	0	1	1	0	0	0	1	1	0	0	1	0	0	1	55188	22312.12208	10384.64
13													2	1	0	0	0	0	0	1	0	1	0	0	0	1	0	0	0	1	0	1	1	0	0	0	1	1	0	0	1	0	0	1	22603.84	9138.574285	4351.2
13													2	2	1	0	0	0	0	1	0	1	0	0	0	1	1	0	0	1	0	1	1	0	1	0	1	1	0	0	0	0	0	1	27684.972	10003.99232	5231.97
13													1	1	1	0	0	0	0	1	0	1	0	0	0	1	1	0	0	1	0	1	1	0	1	0	1	1	0	0	0	0	0	1	9163.908	3311.38732	1598.688
13													1	1	1	0	0	0	0	0	0	0	0	0	0	1	1	0	0	0	0	1	1	0	1	0	1	1	0	0	0	0	0	1	13098.042	4732.990575	2620.926
13													1	1	1	0	0	0	0	1	0	1	0	0	0	1	0	0	0	1	0	1	1	0	1	0	1	1	0	0	0	0	0	1	15130.44	5467.399624	3023.892
13													1	1	1	0	0	0	0	1	0	1	0	0	0	1	1	0	0	1	0	1	1	0	1	0	1	1	0	0	1	0	0	1	14429.916	5214.264577	2612.142
13													2	2	1	0	0	0	0	1	0	1	0	0	0	1	0	0	0	1	0	1	1	0	1	0	1	1	0	0	0	0	0	1	26193.888	9465.187623	5257.224
13													1	1	0	0	0	0	0	0	0	0	0	0	0	1	1	0	0	1	0	1	1	0	1	0	1	1	0	0	1	0	0	1	16144.522	6122.228766	3088.028
13													10	10	1	0	0	0	0	1	1	0	0	0	0	1	1	0	1	1	0	1	1	0	1	0	1	1	0	0	1	0	0	1	157214.235	56874.13608	33221.61
13													28	28	1	0	0	0	1	1	1	1	0	0	0	1	1	0	1	1	0	1	1	0	0	0	1	1	1	0	1	0	0	1	496255.92	179526.5341	132456.18
13													1	1	0	0	0	0	1	0	0	0	0	0	0	1	1	0	0	1	0	1	1	0	0	0	1	1	0	0	0	0	0	1	14344.485	5189.289583	3114.06
13													1	1	1	0	0	0	0	1	1	0	0	0	0	1	1	0	0	1	0	1	1	0	0	0	1	1	0	0	0	0	0	1	13248.6	4792.840033	2890.41
13													1	1	1	0	0	0	0	1	1	0	0	0	0	1	1	0	0	1	0	1	1	0	0	0	1	1	0	0	0	0	0	1	17634.27	6379.408784	3748.8
13													4	4	1	0	0	0	1	1	1	0	0	0	0	1	1	0	0	1	0	1	1	0	0	0	1	1	0	0	0	0	0	1	55372.733	18342.49467	11954.498
13													1	1	1	0	0	0	0	1	1	0	0	0	0	1	0	0	0	1	0	1	1	0	0	0	1	1	0	0	0	0	0	1	16252.207	5383.62483	3538.727
13													1	1	1	0	0	0	1	1	1	0	0	0	0	1	1	0	0	1	0	1	1	0	0	0	1	1	0	0	0	0	0	1	19414.632	6431.193923	4151.015
13													1	1	1	0	0	0	0	1	1	0	0	0	0	1	1	0	0	1	0	1	1	0	0	0	1	1	0	0	0	0	0	1	14490.816	4800.155254	3016.794
13													1	1	1	0	0	0	1	1	1	0	0	0	0	1	1	0	0	1	0	1	1	0	0	0	1	1	0	0	1	0	0	1	14428.099	4779.379934	3076.322
13													6	6	1	0	0	0	1	1	1	0	0	0	0	1	1	0	0	1	0	1	1	0	0	0	1	1	0	0	1	0	0	1	96405.596	31934.8357	21019.762
13													4	4	1	0	0	0	0	1	1	0	0	0	0	1	0	0	0	1	0	1	1	0	0	0	1	1	0	0	0	0	0	1	60421.2	18397.16782	13353.9
13													1	1	1	0	0	0	0	1	1	0	0	0	0	1	1	0	0	0	0	1	1	0	0	0	1	1	0	0	1	0	0	1	15793.05	4808.69945	3271.8
13													1	1	1	0	0	0	0	1	1	0	0	0	0	1	1	0	0	0	0	1	1	0	0	0	1	1	0	0	1	0	0	1	14761.95	4494.74806	3098.55
13													1	1	1	0	0	0	0	0	0	0	0	0	0	1	1	0	0	1	0	1	1	0	0	0	1	1	0	0	0	0	0	1	18852.75	5740.323026	4442.55
13													1	1	1	0	0	0	0	1	1	0	0	0	0	1	1	0	0	1	0	1	1	0	0	0	1	1	0	0	0	0	0	1	17637.9	5370.423068	3789.45
13													3	3	0	0	0	0	0	1	1	0	0	0	0	1	1	0	0	1	0	1	1	0	0	0	1	1	0	0	1	0	0	1	66998.4	20399.80683	15153.6
13													2	2	1	0	0	0	0	1	1	0	0	0	0	1	1	0	0	1	0	1	1	0	0	0	1	1	0	0	1	0	0	1	22119.3	6734.928703	5268.9
13													1	1	1	0	0	0	0	0	0	0	0	0	0	1	0	0	0	1	0	1	1	0	0	0	1	1	0	0	0	0	0	1	23674.35	7208.413437	5575.5
13													1	1	1	0	0	0	0	0	0	0	0	0	0	1	1	0	0	1	0	1	1	0	0	0	1	1	0	0	1	0	0	1	16066.05	4891.823036	3321.15
13													3	3	1	0	0	0	0	1	1	0	0	0	0	1	1	0	0	1	0	1	1	0	0	0	1	1	0	0	0	0	0	1	40120.5	12215.97008	8721.3
13													1	1	1	0	0	0	0	0	0	0	0	0	0	1	1	0	0	0	0	1	1	0	0	0	1	1	0	0	1	0	0	1	21081.9	6419.059076	4027.8
13													1	1	1	0	0	0	0	1	1	0	0	0	0	1	1	0	0	1	0	1	1	0	0	0	1	1	0	0	0	0	0	1	17986.5	5476.565493	3770.55
13													1	1	1	0	0	0	1	1	1	0	0	0	0	1	1	0	0	1	0	1	1	0	0	0	1	1	0	0	0	0	0	1	16714.252	5048.706959	3603.14
13													1	1	1	0	0	0	0	1	1	0	0	0	0	1	1	0	0	1	0	1	1	0	0	0	1	1	0	0	1	0	0	1	12892.148	3894.202225	2802.328
13													1	1	1	0	0	0	0	0	0	0	0	0	0	1	1	0	0	1	0	1	1	0	0	0	1	1	0	0	0	0	0	1	15624.572	4719.558218	3569.216
13													1	1	1	0	0	0	1	1	1	0	0	0	0	1	1	0	0	1	0	1	1	0	0	0	1	1	0	0	0	0	0	1	13781.368	4162.800018	2977.088
13													1	1	1	0	0	0	1	1	1	0	0	0	0	1	1	0	0	1	0	1	1	0	0	0	1	1	0	0	1	0	0	1	10783.72	3257.330463	2338.7
13													3	3	1	0	0	0	0	1	1	0	0	0	0	1	1	0	0	1	0	1	1	0	0	0	1	1	0	0	0	0	0	1	39379.596	11895.00077	8551.932
13													1	1	1	0	0	0	0	1	1	0	0	0	0	1	1	0	0	0	0	1	1	0	0	0	1	1	0	0	0	0	0	1	19061.176	5757.618823	3887.896
13													1	0	1	0	0	0	0	0	0	0	0	0	0	1	1	0	0	0	0	1	1	0	0	0	1	1	0	0	0	0	0	1	17018.54	5140.620192	3730.612
13													1	1	1	0	0	0	0	0	0	0	0	0	0	1	1	0	0	0	0	1	1	0	0	0	1	1	0	0	0	0	0	1	19134.164	5779.665578	3914.624
13													1	1	1	0	0	0	0	1	1	0	0	0	0	1	1	0	0	1	0	1	1	0	0	0	1	1	0	0	0	0	0	1	17890.284	5403.939185	3841.636
13													1	0	1	0	0	0	0	1	1	0	0	0	0	1	1	0	0	1	0	1	1	0	0	0	1	1	0	0	0	0	0	1	17895.424	5405.491773	3952.66
13													1	1	1	0	0	0	0	1	1	0	0	0	0	1	1	0	0	0	0	1	1	0	0	0	1	1	0	0	0	0	0	1	18870.996	5700.173052	4054.432
13													1	1	1	0	0	0	0	1	1	0	0	0	0	1	1	0	0	1	0	1	1	0	0	0	1	1	0	0	0	0	0	1	17698.048	5345.872379	3715.192
13													1	1	1	0	0	0	0	1	1	0	0	0	0	1	1	0	0	1	0	1	1	0	0	0	1	1	0	0	0	0	0	1	16026.52	4840.970631	3449.968
14	1	6.561643836	0	1	3.720547945	8.479452055	2	3	0	1	1	11	4	0	0	1	1	0	0	0	0	0	0	0	0	1	1	0	0	0	0	1	1	1	0	0	0	0	0	0	0	0	0	0	23471.8	10488.09217	4613.05
14													0	0	0	0	0	0	0	0	0	0	0	0	0	1	1	1	1	0	0	1	1	1	0	0	0	0	0	0	0	0	0	0	68265.368	20620.23706	14500.968
14													3	1	1	0	0	0	1	0	0	0	0	0	0	1	1	1	0	0	0	1	1	1	0	0	0	0	0	0	0	0	0	0	91315.184	27582.66448	20306.084
14													0	0	1	0	0	0	0	0	0	0	0	0	0	1	1	1	0	0	0	1	1	1	0	0	0	0	0	0	0	0	0	0	21634.26	6534.844576	4928.232
14													9	3	1	0	0	0	1	1	0	0	1	0	0	1	1	1	0	0	0	1	1	1	0	0	1	0	0	0	1	0	0	0	119839.1	36198.59855	24016.136
14													1	0	1	0	0	0	0	1	0	0	1	0	0	1	1	0	0	0	0	1	1	1	0	0	0	0	0	0	0	0	0	0	9605.632	2901.477202	1669.472
14													2	0	1	0	0	0	1	0	0	0	0	0	0	1	1	0	0	0	0	1	1	1	0	0	0	0	0	0	0	0	0	0	23204.016	7009.005073	4090.412
14													2	0	1	0	0	0	0	0	0	0	0	0	0	1	1	0	0	0	0	1	1	1	0	0	0	0	0	0	0	0	0	0	25372.068	7663.88686	4889.168
14													1	0	1	0	0	0	0	0	0	0	0	0	0	1	1	0	0	0	0	1	1	1	0	0	0	0	0	0	0	0	0	0	15918.58	4808.366275	3099.42
14													1	0	1	0	0	0	0	0	0	0	0	0	0	1	1	0	0	0	0	1	1	1	0	0	0	0	0	0	0	0	0	0	20840.644	6295.124927	4163.4
14													0	0	0	0	0	0	0	0	0	0	0	0	0	1	0	0	1	0	0	1	1	1	0	0	1	0	0	0	1	0	0	0	47003.244	14197.79988	8065.688
15	1	1.230136986	0	1	2.005479452	5.843835616	2	5	0	1	1	21	3	0	1	1	1	0	0	0	0	0	0	0	0	1	1	0	0	0	0	1	1	1	0	0	0	0	0	0	0	0	0	0	30845.92	12470.78953	5302.08
15													2	0	1	1	1	0	1	0	0	0	0	0	0	1	1	0	0	0	0	1	1	1	0	0	0	0	0	0	0	0	0	0	18921.834	6837.423638	2891.034
15													0	0	0	0	0	0	0	0	0	0	0	0	0	0	0	0	0	0	0	0	0	0	0	0	0	0	0	0	0	0	0	0	9408.762	3399.865557	1336.266
15													2	0	1	1	1	0	0	0	0	0	0	0	0	1	1	0	0	0	0	1	1	1	0	0	0	0	0	0	0	0	0	0	14075.262	5086.109999	2902.014
15													0	0	0	0	0	0	0	0	0	0	0	0	0	0	0	0	0	0	0	0	0	0	0	0	0	0	0	0	0	0	0	0	3874.47	1401.636016	1040.505
15													3	2	0	1	1	0	0	0	0	0	0	0	0	1	1	0	0	0	0	1	1	1	0	0	1	0	0	0	1	0	0	0	17899.857	5929.417131	3919.281
15													0	0	0	0	0	0	0	0	0	0	0	0	0	0	0	0	0	0	0	0	0	0	0	0	0	0	0	0	0	0	0	0	8488.055	2811.710659	1804.974
15													1	0	1	1	1	0	0	0	0	0	0	0	0	1	1	0	0	0	0	1	1	1	0	0	0	0	0	0	0	0	0	0	12388.202	4103.653854	2186.591
15													2	0	1	1	1	0	0	0	0	0	0	0	0	1	1	0	0	0	0	1	1	1	0	0	0	0	0	0	0	0	0	0	21815.949	7226.642186	5907.091
15													0	0	0	0	0	0	0	0	0	0	0	0	0	0	0	0	0	0	0	0	0	0	0	0	0	0	0	0	0	0	0	0	154.35	46.9967967	33.6
15													3	0	1	1	1	0	0	1	0	1	0	0	0	1	1	0	1	0	0	1	1	1	0	0	1	0	0	0	1	0	0	0	80904.6	24633.99442	21933.45
15													3	0	1	1	1	0	0	1	0	1	0	0	0	1	1	0	0	0	0	1	1	1	0	0	0	0	0	0	0	0	0	0	28364.7	8636.540585	5801.25
15													3	0	1	1	1	0	0	1	0	1	1	0	0	1	1	0	0	0	0	1	1	1	0	0	0	0	0	0	0	0	0	0	35116.2	10692.25081	6916.35
15													2	0	1	1	1	0	0	1	0	1	1	0	0	1	1	0	0	0	0	1	1	1	0	0	0	0	0	0	0	0	0	0	21096.6	6423.534961	5959.8
15													2	0	1	1	1	0	0	1	0	1	1	0	0	1	1	0	0	0	0	1	1	1	0	0	0	0	0	0	0	0	0	0	22966.65	6992.931525	4667.25
15													2	0	1	1	1	0	0	1	0	1	1	0	0	1	1	0	0	0	0	1	1	1	0	0	0	0	0	0	0	0	0	0	20384.7	6206.774225	4968.6
15													0	0	0	0	0	0	0	0	0	0	0	0	0	0	0	0	0	0	0	0	0	0	0	0	0	0	0	0	0	0	0	0	3283.35	999.7209747	399
15													2	0	1	1	1	0	0	1	0	1	1	0	0	1	1	0	0	0	0	1	1	1	0	0	0	0	0	0	0	0	0	0	23335.2	7105.148366	3773.7
15													0	0	0	1	1	0	0	1	0	1	1	0	0	1	1	0	0	0	0	1	1	1	0	0	1	0	0	0	1	0	0	0	28242.244	8530.852223	5269.528
15													2	0	0	1	1	0	0	1	0	1	0	0	0	1	1	0	0	0	0	1	1	1	0	0	0	0	0	0	0	0	0	0	18708.572	5651.111258	3363.616
15													2	0	0	1	1	0	0	1	0	1	0	0	0	1	1	0	0	0	0	1	1	1	0	0	0	0	0	0	0	0	0	0	22592.356	6824.247053	3961.912
16	1	0.898630137	0	11	1.591780822	4.408219178	3	4	0	1	1	15	3	0	0	1	1	0	0	0	0	0	0	0	0	1	1	0	0	1	0	0	0	0	0	0	0	0	0	0	0	0	0	0	34403.04	13908.90825	6708.8
16													0	0	0	0	0	0	0	0	0	0	0	0	0	0	0	0	0	0	0	1	1	0	0	0	0	0	0	0	0	0	0	0	25749.92	10410.51241	6647.2
16													7	2	0	1	1	0	0	0	0	0	0	0	0	1	1	0	0	1	0	1	1	1	0	0	1	0	1	0	1	0	1	0	97703.518	37050.54187	18915.524
16													4	0	0	1	1	0	0	0	0	0	0	0	0	1	1	1	0	0	0	1	1	1	0	0	0	0	0	0	0	0	0	0	48578.554	18421.66778	8739.314
16													7	3	0	1	1	0	0	1	0	1	1	0	0	1	1	1	0	0	0	1	1	1	0	0	1	0	0	0	1	0	1	0	74676.394	28318.33407	16930.054
16													1	0	0	1	1	0	0	1	0	1	0	0	0	1	1	1	0	0	0	1	1	1	0	0	0	0	0	0	0	0	0	0	14654.608	5557.232518	2542.7
16													0	0	0	0	0	0	0	0	0	0	0	0	0	0	0	0	0	0	0	0	0	0	0	0	0	0	0	0	0	0	0	0	3081.536	1168.561593	340.83
16													4	0	0	1	1	0	1	1	0	1	1	0	0	1	1	1	0	0	0	1	1	1	0	0	0	0	0	0	0	0	0	0	81864.42	29615.43631	16799.31
16													1	0	0	1	1	0	1	1	0	1	1	0	0	1	1	1	0	0	0	1	1	1	0	0	0	0	0	0	0	0	0	0	14752.38	5336.850494	2266.32
16													2	1	0	1	1	0	1	1	0	1	1	0	0	1	1	1	0	0	0	1	1	1	0	0	0	0	0	0	0	0	0	0	16018.347	5306.157535	3774.713
16													43	9	1	0	0	0	1	0	0	0	0	0	0	1	0	0	1	0	0	1	1	0	0	0	1	0	1	0	1	0	1	0	932996.163	309059.644	270316.648
16													0	0	0	0	0	0	1	0	0	0	0	0	0	0	0	0	0	0	0	0	0	0	0	0	1	0	0	0	1	0	0	0	24912.468	8252.379587	5101.337
16													0	0	0	0	0	0	0	0	0	0	0	0	0	0	0	0	0	0	0	0	0	0	0	0	1	0	0	0	1	0	0	0	24253.408	8034.062667	4826.02
16													0	0	0	0	0	0	0	0	0	0	0	0	0	1	0	0	1	0	0	0	0	0	0	0	1	0	0	0	1	0	0	0	17832.888	5907.233314	3971.368
16													0	0	0	0	0	0	0	0	0	0	0	0	0	1	0	0	1	0	0	0	0	0	0	0	1	0	0	0	1	0	0	0	24748.072	7475.402628	4801.788
17	1	3.353424658	1	7	1.876712329	4.082191781	2	4	1	1	1	3	5	0	1	0	0	0	0	1	0	0	1	0	0	1	1	0	0	0	0	1	1	0	0	0	0	0	0	0	0	0	0	0	33104.46	11975.93566	6615.78
17													64	37	1	1	1	0	1	1	0	0	1	0	0	1	1	0	0	0	0	1	1	1	0	0	1	0	1	0	1	0	1	0	1041604.999	345036.8639	206661.019
17													18	14	0	1	1	0	1	0	0	0	0	0	0	0	0	0	0	0	0	1	1	1	0	0	1	0	1	0	1	0	1	0	256437.057	84946.05732	52586.61
18	1	2.446575342	0	1	1.934246575	6.254794521	4	3	0	1	1	3	2	0	0	1	1	0	1	0	0	0	0	0	0	1	1	0	0	0	0	1	1	0	0	0	1	0	0	0	1	0	0	0	20894.94	7550.407464	4015.386
18													2	0	0	1	1	0	0	0	0	0	0	0	0	1	1	0	0	0	0	1	1	1	0	0	0	0	0	0	0	0	0	1	21426.846	8125.359979	4041.27
18													71	56	1	1	1	0	0	1	0	1	1	0	0	1	1	0	1	0	0	1	1	1	0	0	1	0	0	0	1	0	1	0	968433.255	350342.3512	206465.16
19	1	30.04109589	0	9	19.9260274	31.83013699	1	4	1	4	0	1	24	9	0	0	0	0	1	1	0	0	1	0	0	1	0	0	1	0	0	1	1	1	0	0	1	0	0	0	1	0	0	1	308391.9	114979.9108	62714.156
20	1	0.35890411	0	1	2.24109589	4.589041096	2	3	0	1	1	21	2	0	0	1	1	0	0	0	0	0	0	0	0	1	1	0	0	0	0	1	1	0	0	0	0	0	0	0	0	0	0	0	15883.668	5739.579315	2830.644
20													0	0	0	0	0	0	0	0	0	0	0	0	0	0	0	0	0	0	0	1	1	0	0	0	1	0	0	0	1	0	0	0	34381.674	12423.85228	10402.452
20													4	1	0	1	1	0	0	0	0	0	0	0	0	1	1	0	0	0	0	1	1	1	0	0	1	0	1	0	1	0	1	0	108090.718	40989.51354	26628.02
20													4	0	1	1	1	0	0	1	0	0	1	0	0	1	1	0	0	0	0	1	1	1	0	0	0	0	0	0	0	0	0	0	30395.544	11526.41582	6652.136
20													1	0	1	1	1	0	0	0	0	0	0	0	0	1	1	0	0	0	0	1	1	1	0	0	0	0	0	0	0	0	0	0	12251.76	4432.221201	2214.135
20													5	0	1	1	1	0	1	1	0	0	1	0	0	1	1	0	0	0	0	1	1	1	0	0	0	0	0	0	0	0	0	0	54817.847	18158.68591	11216.776
20													1	0	1	1	1	0	1	0	0	0	0	0	0	1	1	0	0	0	0	1	1	1	0	0	0	0	0	0	0	0	0	0	13079.152	4332.534496	2376.868
20													2	0	1	1	1	0	1	0	0	0	0	0	0	1	1	0	0	0	0	1	1	1	0	0	0	0	0	0	0	0	0	0	20107.708	6660.778814	3798.099
20													3	0	0	1	1	0	1	0	0	0	0	0	0	1	1	0	0	0	0	1	1	1	0	0	0	0	0	0	0	0	0	0	27097.996	8976.346665	4988.659
20													0	0	0	0	0	0	0	0	0	0	0	0	0	0	0	0	0	0	0	0	0	0	0	0	0	0	0	0	0	0	0	0	3180.496	1053.555202	385.869
20													2	0	1	1	1	0	1	0	0	0	0	0	0	1	1	0	0	0	0	1	1	1	0	0	0	0	0	0	0	0	0	0	31639.132	10480.62067	6699.026
20													0	0	0	0	0	0	0	0	0	0	0	0	0	0	0	0	0	0	0	0	0	0	0	0	0	0	0	0	0	0	0	0	2148.323	711.6427354	266.813
20													4	0	1	1	1	0	1	0	0	0	0	0	0	1	1	0	0	0	0	1	1	1	0	0	0	0	0	0	0	0	0	0	29439.785	9752.07598	6342.921
20													7	0	1	1	1	0	1	0	0	0	0	0	0	1	1	0	0	0	0	1	1	1	0	0	0	0	0	0	0	0	0	0	55633.168	18428.76507	11479.337
20													1	0	0	1	1	0	1	0	0	0	0	0	0	1	0	0	1	0	0	1	1	1	0	0	1	0	0	0	1	0	0	0	25120.816	8321.395904	6216.424
20													2	0	0	1	1	0	1	0	0	0	0	0	0	1	1	0	0	0	0	1	1	1	0	0	0	0	0	0	0	0	0	0	15923.25	4848.343007	3237.15
20													1	0	0	1	1	0	1	0	0	0	0	0	0	1	1	0	0	0	0	1	1	1	0	0	0	0	0	0	0	0	0	0	10685.85	3253.64898	2008.65
20													2	0	0	1	1	0	1	0	0	0	0	0	0	1	1	0	0	0	0	1	1	1	0	0	0	0	0	0	0	0	0	0	13825.35	4209.570219	2833.95
20													0	0	0	0	0	0	0	0	0	0	0	0	0	0	0	0	0	0	0	0	0	0	0	0	0	0	0	0	0	0	0	0	962.85	293.1704937	123.9
20													0	0	0	0	0	0	0	0	0	0	0	0	0	0	0	0	0	0	0	0	0	0	0	0	0	0	0	0	0	0	0	0	955.5	290.932551	117.6
20													0	0	0	0	0	0	0	0	0	0	0	0	0	0	0	0	0	0	0	0	0	0	0	0	0	0	0	0	0	0	0	0	955.5	290.932551	117.6
21	1	0.802739726	0	6	2.58630137	2.01369863	2	4	1	1	1	3	9	1	0	1	1	0	1	0	0	0	0	0	0	1	1	0	0	0	0	1	1	1	0	0	0	0	0	0	0	0	0	0	75143.826	27153.29667	16966.296
21													2	0	0	1	1	0	0	0	0	0	0	0	0	1	1	0	0	0	0	1	1	1	0	0	0	0	0	0	0	0	0	0	14476.078	5489.531443	2882.448
21													13	1	1	1	1	0	0	1	0	0	1	0	0	1	1	0	0	0	0	1	1	1	0	0	1	0	0	0	1	0	0	0	118383.784	44892.78827	27783.596
22	1	0.695890411	0	9	2.339726027	4.290410959	2	3	1	1	1	3	4	1	0	0	0	0	0	0	0	0	0	0	0	1	1	0	0	0	0	1	1	0	0	0	0	0	0	0	0	0	0	0	34373.94	12435.18528	6458.16
22													4	0	1	0	0	0	0	0	0	0	0	0	0	1	1	0	0	0	0	1	1	1	0	0	0	0	0	0	0	0	0	0	36229.17	13106.337	6838.365
22													0	0	0	0	0	0	0	0	0	0	0	0	0	1	1	0	0	0	0	1	1	1	0	0	0	0	0	0	0	0	0	0	22205.007	7355.519594	4155.267
23	1	2.191780822	0	6	2.643835616	2.191780822	4	4	1	1	1	1	3	0	0	0	0	0	0	0	0	0	0	0	0	1	1	0	0	0	0	1	1	0	0	0	0	0	0	0	0	0	0	0	55765.198	21146.94379	11371.82
24	1		1	7	6.802739726	9.682191781	1	5	1	2	0	2	5	1	1	1	1	0	1	0	0	0	0	0	0	1	1	0	1	0	0	1	1	1	0	0	1	0	1	0	0	0	0	0	69851.04	28240.28651	16521.12
24													13	8	1	0	0	0	1	0	0	0	0	0	0	1	1	0	1	1	0	1	1	1	0	0	1	0	1	1	1	1	1	0	235799.892	85206.52677	46679.274
25	1	0.610958904	1	11	2.978082192	1.920547945	3	5	1	1	1	14	75	26	1	1	1	0	1	0	0	0	0	0	0	1	1	0	1	1	0	1	1	1	0	0	1	0	1	0	1	0	1	0	909872.194	345036.2742	174475.746
25													19	8	1	1	1	0	0	0	0	0	0	0	0	1	0	0	0	1	0	1	1	1	0	0	1	0	0	0	1	0	0	0	237109.48	89915.23435	54832.514
25													4	0	0	1	1	0	0	1	0	0	1	0	0	1	0	0	0	1	0	1	1	1	0	0	0	0	0	0	0	0	0	0	22366.022	8481.508667	5173.042
25													6	0	0	1	1	0	0	1	0	0	1	0	0	1	0	0	0	1	0	1	1	1	0	0	0	0	0	0	0	0	0	0	42949.99	16287.23751	9502.124
25													59	27	0	1	1	0	1	1	0	1	1	0	0	1	0	0	1	1	0	1	1	1	0	0	1	0	0	0	1	0	0	0	570585.465	206416.139	122062.845
25													3	0	1	1	1	0	0	1	0	1	0	0	0	1	0	0	0	1	0	1	1	1	0	0	0	0	0	0	0	0	0	0	18696.075	6763.529484	4151.37
25													18	0	1	1	1	0	1	1	0	1	1	0	0	1	0	0	1	1	0	1	1	1	0	0	0	0	0	0	0	0	0	0	113356.47	41008.0633	25827.315
25													15	14	1	1	1	0	0	1	0	1	1	0	0	1	0	0	0	1	0	1	1	1	0	0	0	0	0	0	0	0	0	0	242652.795	87782.56042	51553.455
25													98	85	1	0	0	0	1	1	0	1	0	0	0	1	1	0	1	0	0	1	1	1	0	0	1	0	1	0	1	1	1	0	2619549.615	947653.5078	572803.86
25													0	0	0	0	0	0	0	1	0	1	0	0	0	0	0	0	0	0	0	0	0	0	0	0	0	0	0	0	0	0	0	0	23346.669	7733.70084	4720.783
25													0	0	0	0	0	0	0	1	0	1	0	0	0	1	0	0	1	0	0	0	0	0	0	0	0	0	0	0	0	0	0	0	26004.169	8614.011002	5084.329
25													0	0	0	0	0	0	0	1	0	1	0	0	0	1	0	0	1	0	0	0	0	0	0	0	1	0	0	0	1	0	0	0	31268.145	10357.72937	6123.943
25													0	0	0	0	0	0	0	0	0	0	0	0	0	1	0	0	1	0	0	0	0	0	0	0	0	0	0	0	0	0	0	0	25782.75	7850.383286	5114.55
25													0	0	0	0	0	0	0	1	0	1	0	0	0	1	1	0	1	0	0	0	0	0	0	0	0	0	0	0	0	0	0	0	61191.7	18483.5649	12590.944
26	1	1.361643836	0	6	2.416438356	1.893150685	3	5	0	2	0	3	2	0	0	0	0	0	0	0	0	0	0	0	0	1	0	1	0	0	0	1	1	0	0	0	0	0	0	0	0	0	0	0	17910.9	5453.546654	3249.75
26													9	0	1	0	0	0	0	1	0	1	0	0	0	1	0	1	1	0	0	1	1	1	0	0	0	0	0	0	0	0	0	0	71203.65	21680.22976	14288.4
26													119	53	1	1	1	0	1	1	0	1	1	0	0	1	1	1	1	0	1	1	1	1	0	0	1	0	1	0	1	1	1	0	2303365.584	695754.6083	532869.968
27	1	0.704109589	0	1	2.723287671	2.271232877	2	4	1	2	1	9	4	0	0	0	0	0	0	1	0	1	0	0	0	1	1	0	0	0	0	1	1	1	0	0	0	0	0	0	0	0	0	0	38864.343	12874.00794	7096.588
27													2	0	0	0	0	0	0	1	0	1	0	0	0	1	1	0	0	0	0	1	1	0	0	0	0	0	0	0	0	0	0	0	18262.65	5560.648197	3497.55
27													3	0	1	0	0	0	0	1	0	1	0	0	0	1	1	0	0	0	0	1	1	0	0	0	0	0	0	0	0	0	0	0	29973.3	9126.330331	6277.95
27													2	1	1	0	0	0	0	1	0	1	1	0	0	1	1	0	1	0	0	1	1	1	0	0	1	0	0	0	1	0	0	0	62249.25	18953.77614	15393
27													1	0	1	0	0	0	0	1	0	1	1	0	0	1	1	0	0	0	0	1	1	1	0	0	0	0	0	0	0	0	0	0	10737.46	3243.357168	2107.4
27													0	0	0	0	0	0	0	0	0	0	0	0	0	1	0	0	1	0	0	1	1	0	0	0	1	0	0	0	1	0	0	0	25687.664	7759.215788	4890.196
27													2	0	1	0	0	0	0	1	0	1	1	0	0	1	1	0	0	0	0	1	1	1	0	0	0	0	0	0	0	0	0	0	18231.58	5507.031055	3967.052
27													1	0	1	0	0	0	0	1	0	1	1	0	0	1	1	0	0	0	0	1	1	1	0	0	0	0	0	0	0	0	0	0	13467.828	4068.092126	2851.672
27													1	0	1	0	0	0	0	1	0	1	1	0	0	1	1	0	0	0	0	1	1	1	0	0	0	0	0	0	0	0	0	0	13789.592	4165.28416	2650.184
28	1	1.934246575	0	6	2.893150685	1.997260274	2	3	1	1	1	4	3	0	0	0	0	0	0	0	0	0	0	0	0	1	1	0	0	0	0	1	1	1	0	0	0	0	0	0	0	0	0	0	25847.85	7870.205064	4669.35
28													22	9	1	1	1	0	0	1	0	1	0	0	0	1	1	0	0	1	1	1	1	1	0	0	1	0	1	0	1	0	0	0	326103.75	99292.72201	73213.35
28													1	0	1	1	1	0	0	1	0	1	0	0	0	1	1	0	0	1	1	1	1	1	0	0	0	0	0	0	0	0	0	0	14604.796	4411.52468	2342.812
28													6	0	1	1	1	0	0	1	0	1	0	0	0	1	1	0	0	0	1	1	1	1	0	0	0	0	0	0	0	0	0	0	50127.336	15141.46311	10092.904
29	0		0	5	4.687671233	32.10958904	2	4	0	4	0	5	2	0	0	0	0	0	0	0	0	0	0	0	0	1	0	0	0	1	1	0	0	0	0	0	0	0	0	0	0	0	0	0	17917.76	7244.024944	2629.76
29													2	1	0	0	0	0	0	0	0	0	0	0	0	1	0	0	0	1	1	0	0	0	0	0	0	0	0	0	0	0	0	0	17236.26	6536.2311	3481.876
29													0	0	0	0	0	0	0	0	0	0	0	0	0	0	0	0	0	0	1	0	0	0	0	0	0	0	0	0	0	0	0	0	27466.57	10415.70788	5036.71
29													1	0	0	0	0	0	0	1	0	1	0	0	0	1	0	0	0	1	1	0	0	0	0	0	0	0	0	0	0	0	0	0	17823.321	5904.064198	2693.642
29													0	0	0	0	0	0	0	1	0	1	0	0	0	1	0	0	1	1	1	0	0	0	0	0	0	0	0	0	0	0	0	0	44743.7	13515.28202	7626.732
30	0		0	9	3.180821918	27.25753425	1	4	0	4	0	4	0	0	0	0	0	0	0	0	0	0	0	0	0	0	0	0	0	0	0	0	0	0	0	0	0	0	0	0	0	0	0	0	4227.65	1889.074671	629.8
30													1	0	0	0	0	0	0	0	0	0	0	0	0	1	0	0	0	1	1	0	0	0	0	0	0	0	0	0	0	0	0	1	9835.84	3976.561261	2480.8
30													11	1	0	0	0	0	1	0	0	0	0	0	0	1	0	0	0	1	1	0	0	0	0	0	1	0	0	0	1	0	0	1	301109.632	99744.07115	65417.02
30													2	2	1	0	0	0	1	0	0	0	0	0	0	0	0	0	0	0	0	0	0	0	0	0	1	0	1	0	1	0	1	0	129371.55	39391.30829	14984.55
31	0		1	7	18.02739726	4.287671233	2	3	1	2	0	4	0	0	0	1	1	0	0	0	0	0	0	0	0	1	0	0	0	1	0	1	0	1	0	0	0	0	0	0	0	0	0	0	10420.48	4212.927121	1818.88
31													0	0	0	0	0	0	0	0	0	0	0	0	0	0	0	0	0	0	0	0	0	0	0	0	0	0	0	0	0	0	0	0	3459.68	1398.724406	393.12
31													0	0	0	1	1	0	0	0	0	0	0	0	0	0	0	0	0	0	0	1	0	1	0	0	0	0	0	0	0	0	0	0	23880.402	8629.207143	4117.5
31													0	0	0	0	0	0	0	0	0	0	0	0	0	0	0	0	0	0	0	0	0	0	0	0	0	0	0	0	0	0	0	0	7034.886	2542.063091	1922.598
32	0		0	10	13.57534247	7.435616438	2	3	1	3	0	3	4	0	1	1	1	0	0	0	0	0	0	0	0	0	0	0	0	0	1	1	1	1	0	0	0	0	0	0	0	0	0	0	42556.142	16137.88483	7551.278
32													16	0	1	1	1	0	1	0	0	0	0	0	0	1	1	0	1	1	0	1	1	1	0	0	0	0	0	0	0	0	0	1	129567.9	46872.74264	23636.61
32													5	0	1	0	0	0	0	0	0	0	0	0	0	1	1	0	0	0	0	1	1	1	0	0	1	0	0	0	1	0	0	1	47906.221	15869.17524	9017.429
33	0		0	1	2.361643836	20.01643836	2	4	0	3	1	13	0	0	0	0	0	0	0	0	0	0	0	0	0	0	0	0	0	0	0	0	0	0	0	0	0	0	0	0	0	0	0	0	38445.092	14333.75277	10493.012
33													3	1	1	0	0	0	1	0	0	0	0	0	0	1	1	0	0	0	1	0	0	0	0	0	1	0	1	0	1	0	1	0	169441.856	63174.19327	47816.784
33													2	1	0	0	0	0	0	0	0	0	0	0	0	1	1	0	0	0	1	1	1	1	0	0	0	0	0	0	0	0	0	1	34301.947	11362.69145	5932.603
33													27	19	0	0	0	0	0	1	1	0	0	0	0	0	0	0	0	0	1	1	1	1	0	0	1	0	1	0	0	0	1	1	583962.239	193440.4115	112707.764
33													4	2	0	0	0	0	0	0	0	0	0	0	0	0	0	0	0	0	1	1	1	1	0	0	0	0	0	0	0	0	0	1	37182.677	12316.94767	8168.092
33													1	0	0	1	1	0	0	0	0	0	0	0	0	1	0	0	1	0	1	1	1	1	0	0	0	0	0	0	0	0	0	1	69612.9	21195.87502	13794.9
33													46	34	1	1	1	0	1	1	0	1	0	0	0	1	0	0	1	1	1	1	1	1	0	0	1	0	1	0	1	0	1	1	925257.9	281724.3759	178143
33													12	0	0	0	0	0	0	1	0	1	0	0	0	1	1	0	0	0	1	1	0	1	0	0	1	0	0	0	0	0	1	1	90850.528	27442.31049	20351.316
33													2	0	0	0	0	0	0	1	0	1	0	0	0	0	0	0	0	0	1	1	0	1	0	0	1	0	0	0	0	0	1	1	12577.58	3799.183815	2856.812
33													2	0	0	0	0	0	0	1	0	1	0	0	0	0	0	0	0	0	1	1	0	1	0	0	0	0	0	0	0	0	0	1	17112.088	5168.877301	3431.464
33													2	0	0	0	0	0	0	1	0	1	0	0	0	1	0	0	1	0	1	1	0	1	0	0	1	0	0	0	1	0	1	1	31242.976	9437.253331	6027.164
33													9	4	0	0	0	0	0	1	0	1	0	0	0	0	0	0	0	0	1	1	0	1	0	0	1	0	1	0	0	0	1	1	92339.072	27891.94009	19805.448
33													2	0	0	0	0	0	0	1	0	1	0	0	0	0	0	0	0	0	1	1	0	1	0	0	0	0	0	0	0	0	0	1	13775.2	4160.936912	2945.22
34	0		1	7	13.94794521	2.024657534	2	5	0	1	1	1	7	3	0	0	0	0	1	0	0	0	0	0	0	1	0	1	1	1	0	0	0	0	0	0	1	0	1	0	1	0	0	0	126166.88	51008.38642	28404.32
35	0		1	1	9.534246575	10.50136986	2	3	0	3	1	5	0	0	0	1	1	0	0	0	0	0	0	0	0	1	1	0	0	0	0	0	0	0	0	0	0	0	0	0	0	0	0	0	10601.92	4286.282043	1571.36
35													5	0	0	1	1	0	0	0	0	0	0	0	0	0	0	0	0	0	0	0	0	0	0	0	0	0	0	0	0	0	0	0	61487.775	22243.94046	11886.465
35													1	0	0	1	1	0	0	0	0	0	0	0	0	1	1	0	0	0	0	0	0	0	0	0	0	0	0	0	0	0	0	0	11301.78	4088.554536	1934.04
35													0	0	0	1	1	0	0	0	0	0	0	0	0	1	1	0	0	0	0	0	0	0	0	0	0	0	0	0	0	0	0	0	5747.805	2079.337432	1025.595
35													0	0	0	0	0	0	0	0	0	0	0	0	0	1	0	0	1	0	0	0	0	0	0	0	0	0	0	0	0	0	0	0	27841.8	8477.326948	5361.3
36	0		0	2	2.161643836	17.56712329	2	5	0	3	1	5	0	0	0	0	0	0	0	0	0	0	0	0	0	0	0	0	0	0	0	0	0	0	0	0	0	0	0	0	0	0	0	0	2651.975	1185.003205	364.25
36													1	0	0	1	1	0	0	0	0	0	0	0	0	1	1	0	0	0	1	1	0	1	0	0	0	0	0	0	0	0	0	0	10735.772	4002.693025	1740.936
36													0	0	0	0	0	0	0	0	0	0	0	0	0	0	0	0	0	0	0	0	0	0	0	0	0	0	0	0	0	0	0	0	2360.96	954.5196013	274.4
36													0	0	0	0	0	0	0	0	0	0	0	0	0	1	1	0	0	0	1	0	0	0	0	0	0	0	0	0	0	0	0	0	24041.871	7963.989978	3510.026
36													4	1	0	0	0	0	1	0	0	0	0	0	0	1	1	0	0	0	1	0	0	0	0	0	1	0	1	0	0	0	0	0	75914.145	25146.9401	16049.174
37	0		0	1	4.967123288	17.43835616	2	3	1	2	0	7	3	2	0	0	0	0	1	0	0	0	0	0	0	1	1	0	0	0	0	1	1	0	0	1	0	0	0	0	0	0	0	0	62565.44	25294.76943	12496.96
37													2	0	0	0	0	0	0	0	0	0	0	0	0	1	1	0	0	0	0	1	1	1	0	0	0	0	0	0	0	0	0	0	23393.922	8871.302737	3356.364
37													0	0	0	0	0	0	0	0	0	0	0	0	0	1	1	0	0	0	0	1	1	1	0	0	0	0	0	0	0	0	0	0	43284.328	16414.02316	12122.728
37													7	5	1	0	0	0	1	0	0	0	0	0	0	1	1	0	1	0	0	1	1	0	0	0	1	0	1	0	1	0	1	0	276889.21	105000.2649	50363.854
37													0	0	0	0	0	0	0	0	0	0	0	0	0	0	0	0	0	0	0	0	0	0	0	0	0	0	0	0	0	0	0	0	4890.48	1769.189826	599.595
37													1	0	0	0	0	0	0	0	0	0	0	0	0	1	1	0	0	0	0	1	1	1	0	0	0	0	0	0	0	0	0	0	14528.85	4423.773306	2035.95
37													3	0	0	0	0	0	0	0	0	0	0	0	0	1	1	0	0	0	0	1	1	1	0	0	0	0	0	0	0	0	0	0	26650.9	8050.170854	5563.536
38	0		1	11	10.40547945	3.868493151	2	3	1	3	1	1	2	1	0	1	1	0	0	1	0	0	1	0	0	1	1	0	0	0	0	0	0	0	0	0	0	0	0	0	0	0	0	0	74937.7	27939.54725	15786.336
39	0		0	2	2.147945205	15.17260274	2	3	1	3	1	8	5	0	0	1	1	0	0	0	0	0	0	0	0	0	0	0	0	0	1	0	0	0	0	0	0	0	0	0	0	0	0	0	65474.08	26470.71223	15510.88
39													5	0	0	1	1	0	0	0	0	0	0	0	0	0	0	0	0	0	1	0	0	0	0	0	0	0	0	0	0	0	0	0	35309.12	14275.23005	6573.28
39													17	10	0	0	0	0	0	0	0	0	0	0	0	0	0	0	0	0	1	1	1	1	0	0	1	0	1	0	1	0	0	0	341689.914	123469.9921	64831.41
39													0	0	0	0	0	0	0	0	0	0	0	0	0	0	0	0	0	0	0	0	0	0	0	0	0	0	0	0	0	0	0	0	21466.88	8140.541432	6406.522
39													3	0	0	1	1	0	0	0	0	0	0	0	0	0	0	0	0	0	1	1	0	1	0	0	0	0	0	0	0	0	0	0	21434.42	8128.232146	4118.092
39													4	0	0	1	1	0	0	0	0	0	0	0	0	0	0	0	0	0	1	1	0	1	0	0	0	0	0	0	0	0	0	0	35480.475	12835.4876	6974.685
39													5	3	0	1	1	0	0	1	0	1	0	0	0	0	0	0	0	0	1	1	0	1	0	0	1	0	0	0	1	0	0	0	61324.83	22184.99315	12767.22
39													0	0	0	0	0	0	0	0	0	0	0	0	0	0	0	0	0	0	0	0	0	0	0	0	0	0	0	0	0	0	0	0	2875.415	952.4955958	338.034
40	0		1	11	6.282191781	11.74246575	2	3	0	3	1	2	5	1	0	0	0	0	0	0	0	0	0	0	0	1	1	0	0	0	1	0	0	0	0	0	0	0	0	0	0	0	0	0	73937.85	22512.74444	12679.8
40													2	2	0	0	0	0	0	0	0	0	0	0	0	1	1	0	0	1	1	0	0	0	0	0	0	0	0	0	0	0	0	0	54542.596	16475.13655	8552.96
41	0		0	9	3.624657534	9.983561644	2	4	0	2	0	3	1	0	0	0	0	0	0	0	0	0	0	0	0	0	0	0	0	0	0	0	0	0	0	0	0	0	0	0	0	0	0	0	31472.1	11733.96335	5710.64
41													0	0	0	0	0	0	0	0	0	0	0	0	0	0	0	0	0	0	0	0	0	0	0	0	1	0	0	0	1	0	0	0	21320.108	7948.925106	4052.936
41													3	2	0	0	0	0	0	0	0	0	0	0	0	1	1	0	0	0	0	1	1	0	0	0	1	0	0	0	1	0	0	0	103203.825	37335.22214	21351.12
42	0		0	5	3.991780822	12.54520548	2	3	1	3	1	1	0	0	0	1	1	0	0	0	0	0	0	0	0	1	1	0	0	0	0	0	0	0	0	0	0	0	0	0	0	0	0	0	42276.076	15762.08535	8955.532
43	0		0	2	2.084931507	10.49863014	2	3	0	3	1	1	0	0	0	1	1	0	0	0	0	0	0	0	0	1	1	0	1	1	1	1	1	0	0	0	1	0	1	0	0	0	0	0	50088.15	15250.94009	10712.1
44	0		0	6	1.904109589	10.01917808	2	3	0	2	1	1	0	0	0	1	1	0	0	0	0	0	0	0	0	1	1	0	0	0	0	0	0	0	0	0	0	0	0	0	0	0	0	0	48456.855	16051.5755	10476.928
45	0		0	9	1.608219178	11.7890411	2	5	0	3	1	4	4	1	0	0	0	0	1	0	0	0	0	0	0	0	0	0	0	0	0	1	1	0	0	0	1	0	0	0	1	0	1	0	112748.158	37348.39108	23066.037
45													0	0	0	0	0	0	0	0	0	0	0	0	0	0	0	0	0	0	0	0	0	0	0	0	0	0	0	0	0	0	0	0	2419.388	801.4343719	311.459
45													2	1	0	0	0	0	1	0	0	0	0	0	0	1	1	0	1	0	1	0	0	0	0	0	1	0	0	0	1	0	0	0	99631.35	30335.95271	20525.4
45													2	0	0	0	0	0	0	0	0	0	0	0	0	1	1	0	0	0	1	0	0	0	0	0	0	0	0	0	0	0	0	0	14613.02	4414.008821	2850.644
46	0		0	11	1.734246575	8.884931507	2	4	0	3	1	2	0	0	0	1	1	0	0	0	0	0	0	0	0	1	1	0	0	0	0	0	0	0	0	0	0	0	0	0	0	0	0	0	28831.284	10418.2133	7497.144
46													0	0	0	1	1	0	0	0	0	0	0	0	0	1	1	0	0	0	0	0	0	0	0	0	0	0	0	0	0	0	0	0	39274.005	14207.8426	8403.915
47	0		0	9	3.75890411	10.05479452	2	3	0	3	1	1	0	0	0	0	0	0	0	0	0	0	0	0	0	0	0	0	0	0	0	0	0	0	0	0	0	0	0	0	0	0	0	0	29165.388	8809.697099	5561.48
48	0		0	6	1.909589041	11.33424658	2	4	1	3	1	2	0	0	0	0	0	0	0	0	0	0	0	0	0	0	0	0	0	0	0	0	0	0	0	0	0	0	0	0	0	0	0	0	29351.5	13115.36556	7492.975
48													0	0	0	1	1	0	0	0	0	0	0	0	0	1	0	0	1	0	0	0	0	0	0	0	1	0	0	0	1	0	0	0	42816.9	13036.97535	8716.05
49	0		0	9	0.452054795	17.6109589	2	3	1	3	1	1	0	0	0	0	0	0	1	0	0	0	0	0	0	1	1	0	0	0	0	0	0	0	0	0	0	0	0	0	0	0	0	0	36527.166	13199.12796	10269.594
50	0		0	9	2.030136986	4.767123288	2	4	1	2	1	3	0	0	0	0	0	0	0	0	0	0	0	0	0	0	0	0	0	0	0	0	0	0	0	0	0	0	0	0	0	0	0	0	34211.82	12755.43233	7057.38
50													7	1	1	0	0	0	1	0	0	0	0	0	0	1	1	0	1	0	0	1	1	1	0	0	1	0	1	0	1	0	1	0	170394.56	68889.32785	30232.16
50													7	1	1	0	0	0	1	0	0	0	0	0	0	1	1	0	1	0	0	1	1	1	0	0	1	0	1	0	1	0	1	0	170394.56	68889.32785	30232.16
51	0		0	6	1.57260274	4.652054795	2	4	0	3	1	1	3	1	0	0	0	0	1	0	0	0	0	0	0	0	0	0	0	0	0	1	1	0	0	0	0	0	0	0	0	0	0	0	53935.84	21805.88256	10419.36
52	0		0	10	2.246575342	9.106849315	2	4	1	3	1	1	2	0	0	0	0	0	0	0	0	0	0	0	0	1	1	0	0	1	0	1	1	0	0	0	0	0	0	0	0	0	0	0	48513.194	16070.23808	10112.319
53	0		1	6	3.542465753	11.1369863	2	5	0	2	1	1	2	0	0	0	0	0	0	0	0	0	0	0	0	0	0	0	0	0	0	0	0	0	0	0	0	0	0	0	0	0	0	0	29566.88	11953.68262	6207.04
54	0		0	1	2.087671233	5.369863014	2	3	0	3	1	1	0	0	0	1	1	0	1	0	0	0	0	0	0	1	1	0	0	0	0	0	0	0	0	0	0	0	0	0	0	0	0	0	39477.492	14265.23121	11182.032
55	0		0	6	1.767123288	3.136986301	2	5	1	3	1	1	0	0	0	1	1	0	0	0	0	0	0	0	0	1	1	0	0	0	0	0	0	0	0	0	0	0	0	0	0	0	0	0	26703.6	9956.090113	7066.628
56	0		0	6	1.934246575	10.42739726	2	3	1	3	1	2	0	0	0	0	0	0	0	0	0	0	0	0	0	0	0	0	0	0	0	0	0	0	0	0	0	0	0	0	0	0	0	0	21434.56	8665.842566	5272.96
56													6	2	0	1	1	0	1	0	0	0	0	0	0	1	1	0	0	0	0	1	1	0	0	0	1	0	1	0	1	0	1	0	160356.312	57944.9137	28979.514
57	0		0	9	1.610958904	7.410958904	2	4	0	3	1	1	2	1	0	1	1	0	0	0	0	0	0	0	0	1	1	0	0	0	0	0	0	0	0	0	0	0	0	0	0	0	0	0	57359.48	19000.61455	12194.736
58	0		0	6	1.419178082	5.408219178	2	5	0	3	1	1	0	0	0	0	0	0	0	0	0	0	0	0	0	1	1	0	0	0	0	0	0	0	0	0	0	0	0	0	0	0	0	0	36989.252	14026.84221	11169.486
59	0		0	1	6.82739726	0.246575342	2	3	1	1	1	3	2	0	0	1	1	0	0	0	0	0	0	0	0	1	1	0	0	0	0	1	1	1	0	0	0	0	0	0	0	0	0	0	11947.04	4830.104643	2479.68
59													0	0	0	0	0	0	0	0	0	0	0	0	0	0	0	0	0	0	0	0	0	0	0	0	0	0	0	0	0	0	0	0	1476.81	533.6467703	167.994
59													6	1	0	1	1	0	0	0	0	0	0	0	0	1	1	0	0	0	0	1	1	1	0	0	1	0	1	0	1	0	1	0	118053.666	42658.81026	27269.928
60	0		0	1	1.742465753	2.515068493	2	4	1	3	1	1	0	0	0	1	1	0	0	0	0	0	0	0	0	1	1	0	0	0	0	0	0	0	0	0	0	0	0	0	0	0	0	0	27571.756	10279.77079	5463.256
61	0		0	6	2.15890411	4.197260274	2	3	1	3	0	2	0	0	0	0	0	0	0	0	0	0	0	0	0	0	0	0	0	0	0	1	1	0	0	0	0	0	0	0	0	0	0	0	20739.04	8384.648699	5163.2
61													0	0	0	0	0	0	0	0	0	0	0	0	0	1	0	0	1	0	0	0	0	0	0	0	0	0	0	0	0	0	0	0	12760.956	4611.184212	3814.452
62	0		0	2	1.802739726	4.060273973	2	5	0	3	1	4	6	1	0	1	1	0	0	0	0	0	0	0	0	1	1	0	0	0	0	0	0	0	0	0	0	0	0	0	0	0	0	0	47782.55	21351.05908	8812.5
62													1	0	0	1	1	0	0	0	0	0	0	0	0	1	1	0	0	0	0	0	0	0	0	0	0	0	0	0	0	0	0	0	23841.925	10653.47808	3678.925
62													0	0	0	0	0	0	1	0	0	0	0	0	0	0	0	0	0	0	0	0	0	0	0	0	0	0	0	0	0	0	0	0	34602.4	13989.5081	7346.08
62													12	1	0	0	0	0	1	0	0	0	0	0	0	1	1	0	0	1	1	0	0	0	0	0	1	0	1	0	0	0	0	0	94691.52	34216.87544	18959.166
63	0		0	9	1.745205479	5.342465753	2	4	1	3	1	5	1	0	0	1	1	0	0	0	0	0	0	0	0	1	1	0	0	0	0	0	0	0	0	0	0	0	0	0	0	0	0	0	8196.8	3662.641718	1508.7
63													4	0	0	0	0	0	0	0	0	0	0	0	0	1	1	0	0	0	1	0	0	0	0	0	0	0	0	0	0	0	0	0	31198.72	12613.4241	6528.48
63													0	0	0	0	0	0	0	0	0	0	0	0	0	1	1	0	0	0	1	0	0	0	0	0	0	0	0	0	0	0	0	0	31105.76	12575.84103	8744.96
63													0	0	0	0	0	0	0	0	0	0	0	0	0	0	0	0	0	0	0	0	0	0	0	0	0	0	0	0	0	0	0	0	1469.124	530.8694265	177.876
63													5	0	0	0	0	0	0	0	0	0	0	0	0	1	1	0	0	0	1	0	0	0	0	0	0	0	0	0	0	0	0	0	86759.088	32900.2608	16183.474
64	0		0	11	3.8	7.42739726	2	4	1	1	1	3	2	2	0	1	1	0	0	1	0	0	1	0	0	1	1	0	0	0	0	1	1	0	0	0	1	0	0	0	1	0	0	0	39442.615	13065.56343	7504.78
64													1	1	0	1	1	0	0	1	0	0	1	0	0	1	1	0	0	0	0	0	0	0	0	0	1	0	0	0	1	0	0	0	23254.188	7703.066046	4768.618
64													0	0	0	1	1	0	0	0	0	0	0	0	0	1	1	0	1	0	0	0	0	0	0	0	1	0	0	0	1	0	0	0	48828.972	14749.27928	9571.708
65	0		0	1	1.589041096	2.052054795	2	4	1	3	1	1	0	0	0	0	0	0	0	0	0	0	0	0	0	1	1	0	0	0	0	0	0	0	0	0	0	0	0	0	0	0	0	0	33496.256	12488.6436	9435.272
66	0		1	8	7.654794521	10.79178082	2	5	0	1	0	1	18	18	1	0	0	0	1	0	0	0	0	0	0	1	0	0	1	0	0	1	1	0	0	0	1	0	1	1	1	1	1	0	649778.24	196272.0152	106614.908
67	0		0	11	2.44109589	4.282191781	2	4	1	1	1	3	5	0	0	1	1	0	0	0	0	0	0	0	0	1	1	0	0	0	0	1	1	0	0	0	0	0	0	0	0	0	0	0	32192.65	14384.89934	6538.875
67													0	0	0	1	1	0	0	0	0	0	0	0	0	1	1	0	0	0	0	0	0	0	0	0	1	0	0	0	1	0	0	0	49893.76	20171.69791	10293.92
67													0	0	0	0	0	0	0	0	0	0	0	0	0	1	1	1	0	0	0	0	0	0	0	0	0	0	0	0	0	0	0	0	41638.606	15789.94234	9016.306
68	0		0	9	2.005479452	5.665753425	2	3	0	1	1	3	1	0	0	1	1	0	0	0	0	0	0	0	0	1	1	0	0	0	0	0	0	0	0	0	0	0	0	0	0	0	0	0	14768.32	5970.728398	2298.24
68													1	0	0	1	1	0	0	0	0	0	0	0	0	1	1	0	0	0	0	0	0	0	0	0	0	0	0	0	0	0	0	0	15454.88	6248.2998	2430.4
68													0	0	0	1	1	0	0	0	0	0	0	0	0	1	1	0	0	0	0	0	0	0	0	0	0	0	0	0	0	0	0	0	82196.7	29735.64259	18147.6
69	0		0	1	2.279452055	0.528767123	2	4	0	1	1	3	6	0	0	1	1	0	0	0	0	0	0	0	0	1	1	0	0	0	1	1	1	1	0	0	0	0	0	0	0	0	0	0	38700.975	17293.06627	7557.6
69													0	0	0	0	0	0	0	0	0	0	0	0	0	0	0	0	0	0	0	1	1	0	0	0	0	0	0	0	0	0	0	0	4394.5	1963.629591	484.1
69													4	4	0	1	1	0	1	0	0	0	0	0	0	0	0	0	0	0	1	1	1	1	0	0	1	0	1	0	1	0	1	0	66586.075	29753.18858	14568.825
70	0		0	11	1.545205479	6.301369863	2	3	0	3	1	1	1	0	0	0	0	0	0	0	0	0	0	0	0	1	1	0	0	0	0	0	0	0	0	0	0	0	0	0	0	0	0	0	12737.4	4607.907299	1829.67
71	0		0	2	2.024657534	3.271232877	2	5	0	1	1	3	22	1	0	1	1	0	0	0	0	0	0	0	0	1	1	0	0	0	0	1	1	1	0	0	1	0	1	0	1	0	0	0	195309.675	87271.78456	41070.95
71													5	0	0	1	1	0	0	0	0	0	0	0	0	1	1	0	0	0	0	0	0	0	0	0	0	0	0	0	0	0	0	0	37050.1	16555.39258	7340.225
71													0	0	0	1	1	0	0	0	0	0	0	0	0	1	1	0	0	0	0	0	0	0	0	0	1	0	1	0	1	0	0	0	35622.414	12872.19492	10479.312
72	0		0	1	1.534246575	7.75890411	2	4	0	1	1	5	1	0	0	1	1	0	0	0	0	0	0	0	0	1	1	0	0	0	0	1	0	1	0	0	0	0	0	0	0	0	0	0	28636.432	10676.7214	5020.508
72													0	0	0	1	1	0	0	0	0	0	0	0	0	1	1	0	0	0	0	1	1	0	0	0	0	0	0	0	0	0	0	0	10466.4	4231.492255	1529.92
72													0	0	0	1	1	0	0	0	0	0	0	0	0	1	1	0	0	0	0	1	0	1	0	0	0	0	0	0	0	0	0	0	5509.764	1990.958731	1976.4
72													0	0	0	0	0	0	0	0	0	0	0	0	0	1	1	0	0	0	0	1	0	1	0	0	0	0	0	0	0	0	0	0	28449.069	9423.896352	4993.974
72													0	0	0	0	0	0	0	0	0	0	0	0	0	1	0	0	1	0	0	1	0	1	0	0	0	0	0	0	0	0	0	0	44335.2	13499.27037	7125.3
73	0		0	11	1.934246575	7.810958904	2	4	0	1	1	1	0	0	0	0	0	0	0	0	0	0	0	0	0	1	0	0	1	0	0	0	0	0	0	0	1	0	0	0	1	0	0	0	27518.532	8312.247776	5319.9
74	0		0	11	1.868493151	5.953424658	2	4	1	1	1	2	0	0	0	0	0	0	0	0	0	0	0	0	0	1	1	0	0	0	0	0	0	0	0	0	1	0	0	0	1	0	0	0	44023.334	16694.26458	13964.292
74													3	1	0	0	0	0	0	0	0	0	0	0	0	1	1	0	0	0	0	0	0	0	0	0	1	0	0	0	1	0	0	0	97825.764	32405.27345	21267.441
75	0		0	11	2.126027397	4.37260274	2	4	1	1	1	2	0	0	0	1	1	0	0	0	0	0	0	0	0	1	1	0	1	0	0	0	0	0	0	0	0	0	0	0	0	0	0	0	35654.256	12883.70106	10930.59
75													0	0	0	0	0	0	0	0	0	0	0	0	0	0	0	0	0	0	0	0	0	0	0	0	0	0	0	0	0	0	0	0	9622.275	3480.973449	1282.26
76	0		0	11	2.849315068	0.153424658	2	4	1	1	1	2	6	0	1	1	1	0	0	0	0	0	0	0	0	1	1	0	0	0	1	1	1	0	0	0	0	0	0	0	0	0	0	0	43006.668	16034.47708	8453.828
76													2	0	0	1	1	0	0	0	0	0	0	0	0	1	1	0	0	0	1	1	1	1	0	0	0	0	0	0	0	0	0	0	20050.82	7475.687576	3065.712
77	0		0	11	2.449315068	0.849315068	2	3	1	1	1	2	33	13	0	1	1	0	1	1	0	1	0	0	0	1	1	0	1	0	1	1	1	0	0	0	1	0	1	0	1	0	1	0	533457.008	198892.5105	91810.676
77													11	1	0	1	1	0	0	0	0	0	0	0	0	1	1	0	0	0	1	1	1	1	0	0	0	0	0	0	0	0	0	0	97891.236	36497.47476	19343.348
78	0		0	9	1.863013699	9.178082192	2	3	1	3	1	1	0	0	0	0	0	0	0	0	0	0	0	0	0	1	0	0	1	0	0	0	0	0	0	0	1	0	0	0	1	0	0	0	62455.05	19016.43853	12183.15
79	0		1	8	1.512328767	3.131506849	2	5	0	1	1	1	0	0	0	1	1	0	0	0	0	0	0	0	0	1	1	0	1	0	0	0	0	0	0	0	1	0	0	0	1	0	0	0	45826.128	16559.31718	13974.246
80	0		0	1	2.375342466	1.98630137	2	4	0	3	1	3	3	0	0	1	1	0	0	0	0	0	0	0	0	1	1	0	0	0	0	1	1	0	0	0	0	0	0	0	0	0	0	0	21205.664	7906.256149	4351.184
80													1	0	0	1	1	0	0	0	0	0	0	0	0	0	0	0	0	0	0	0	0	0	0	0	0	0	0	0	0	0	0	0	30745.12	12430.0368	4783.52
80													0	0	0	1	1	0	0	0	0	0	0	0	0	1	1	0	0	0	0	0	0	0	0	0	1	0	0	0	1	0	0	0	39922.182	14425.92039	10940.472
81	0		0	2	2.101369863	1.131506849	2	4	0	1	1	1	0	0	0	1	1	0	0	0	0	0	0	0	0	1	1	0	0	0	0	1	1	0	0	0	1	0	0	0	1	0	0	0	32263.84	13044.04467	9500.96
82	0		0	1	2.082191781	2.153424658	2	5	1	1	1	1	0	0	0	0	0	0	0	0	0	0	0	0	0	0	0	0	0	0	0	0	0	0	0	0	0	0	0	0	0	0	0	0	2010.438	726.4737817	222.894
83	0		0	9	1.901369863	3.550684932	2	4	1	1	1	2	3	1	0	1	1	0	1	0	0	0	0	0	0	1	1	0	0	0	0	1	1	0	0	0	1	0	1	0	1	0	1	0	101230.11	36579.60148	24109.884
83													0	0	0	1	1	0	0	0	0	0	0	0	0	1	1	0	0	0	0	0	0	0	0	0	0	0	0	0	0	0	0	0	61182.772	23201.3637	13351.88
84	0		0	9	2.024657534	5.263013699	2	5	0	1	1	3	0	0	0	0	0	0	0	0	0	0	0	0	0	0	0	0	0	0	0	0	0	0	0	0	0	0	0	0	0	0	0	0	7703.36	3114.414524	885.92
84													2	0	0	0	0	0	0	0	0	0	0	0	0	1	1	0	0	0	0	0	0	0	0	0	0	0	0	0	0	0	0	0	22465.442	7441.78999	2763.8
84													1	0	0	0	0	0	0	0	0	0	0	0	0	1	1	0	0	0	0	0	0	0	0	0	0	0	0	0	0	0	0	0	17929.621	5939.276604	2478.916
85	0		0	1	2.090410959	2.210958904	2	4	0	1	1	2	0	0	0	0	0	0	0	0	0	0	0	0	0	1	1	0	0	0	0	0	0	0	0	0	1	0	0	0	1	0	0	0	37644.93	13603.0331	11242.422
85													0	0	0	1	1	0	0	0	0	0	0	0	0	1	1	0	0	0	0	0	0	0	0	0	0	0	0	0	0	0	0	0	15060.168	5442.006767	3398.31
86	0		0	1	1.926027397	6.983561644	2	3	1	1	1	3	6	0	0	1	1	0	0	0	0	0	0	0	0	1	1	0	0	0	0	1	1	0	0	0	0	0	0	0	0	0	0	0	33036.168	12317.10577	7268.928
86													4	0	0	1	1	0	0	0	0	0	0	0	0	1	1	0	0	0	0	1	1	0	0	0	0	0	0	0	0	0	0	0	23113.064	8617.405443	4923.404
86													0	0	0	1	1	0	0	0	0	0	0	0	0	0	0	0	0	0	0	0	0	0	0	0	1	0	0	0	1	0	0	0	39768.91	15080.92744	8149.624
87	0		1	1	1.62739726	4.304109589	2	4	1	1	1	3	5	2	0	1	1	0	0	0	0	0	0	0	0	1	1	0	0	0	0	1	1	0	0	0	0	0	0	0	0	0	0	0	44813.496	16708.12941	7600.7
87													10	0	0	1	1	0	0	0	0	0	0	0	0	1	1	0	0	0	0	1	1	1	0	0	0	0	0	0	0	0	0	0	60391.752	22516.27964	12979.568
87													13	3	0	1	1	0	0	0	0	0	0	0	0	1	1	0	0	0	0	1	1	1	0	0	0	0	0	0	0	0	0	0	91977.76	37185.96452	20109.6
88	0		0	9	2.054794521	3.687671233	2	5	1	1	1	1	0	0	0	1	1	0	0	0	0	0	0	0	0	1	1	0	1	0	0	0	0	0	0	0	0	0	0	0	0	0	0	0	39838.158	15107.18725	11874.95
89	0		0	6	1.78630137	1.865753425	2	4	1	1	1	1	0	0	0	1	1	0	0	0	0	0	0	0	0	1	1	0	0	0	0	0	0	0	0	0	0	0	0	0	0	0	0	0	58221.45	21038.37918	18675.882
90	0		0	1	1.780821918	0.323287671	1	5	0	1	1	1	62	17	1	1	1	0	1	1	0	1	1	0	0	1	1	0	0	0	0	1	1	1	0	0	1	0	1	0	1	0	1	0	766843.004	285907.4451	152748.06
91	0		1	6	2.191780822	1.969863014	2	4	0	1	1	1	0	0	0	1	1	0	0	0	0	0	0	0	0	1	1	0	1	0	0	0	0	0	0	0	0	0	0	0	0	0	0	0	54686.444	20737.86518	16933.3
92	0		0	6	2.087671233	1.953424658	2	4	0	1	1	1	0	0	0	1	1	0	0	0	0	0	0	0	0	1	1	0	1	0	0	0	0	0	0	0	0	0	0	0	0	0	0	0	41853.924	15871.59394	12998.066
93	0		0	9	2.254794521	2.690410959	2	4	0	1	1	2	5	0	0	0	0	0	0	0	0	0	0	0	0	1	1	0	0	0	0	1	1	1	0	0	0	0	0	0	0	0	0	0	27595.68	11156.74025	5424.16
93													2	0	0	0	0	0	0	0	0	0	0	0	0	1	1	0	0	0	0	0	0	0	0	0	0	0	0	0	0	0	0	0	17374.41	6285.40131	3154.53
94	0		0	11	1.512328767	3.131506849	2	4	0	1	1	2	0	0	0	0	0	0	0	0	0	0	0	0	0	0	0	0	0	0	0	0	0	0	0	0	0	0	0	0	0	0	0	0	19139.238	6915.982791	4847.67
94													1	0	0	1	1	0	0	0	0	0	0	0	0	1	1	0	0	0	0	0	0	0	0	0	0	0	0	0	0	0	0	0	11462.708	4346.819352	1933.534
95	0		0	6	1.854794521	1.309589041	2	3	1	1	1	1	0	0	0	0	0	0	0	0	0	0	0	0	0	1	1	0	0	0	0	0	0	0	0	0	1	0	0	0	1	0	0	0	35938.638	12986.46278	10937.178
96	0		0	5	2.189041096	2.476712329	2	4	0	1	1	2	3	0	0	0	0	0	0	0	0	0	0	0	0	1	1	0	0	0	0	1	1	1	0	0	0	0	0	0	0	0	0	0	16451.68	6651.299062	3446.24
96													0	0	0	0	0	0	0	0	0	0	0	0	0	1	1	0	0	0	0	0	0	0	0	0	1	0	0	0	1	0	0	0	62599.635	22646.16916	14561.745
97	0		0	11	2.263013699	8.068493151	2	4	1	3	1	10	34	9	0	1	1	0	0	1	0	1	1	0	0	1	1	0	0	0	1	1	1	1	0	0	1	0	0	0	1	0	0	0	332358.15	148510.251	67044.325
97													2	0	0	1	1	0	0	1	0	1	0	0	0	1	1	0	0	0	1	1	1	1	0	0	0	0	0	0	0	0	0	0	21797.425	9739.917792	3595.5
97													5	0	0	1	1	0	0	1	0	1	0	0	0	1	1	0	0	0	1	1	1	1	0	0	0	0	0	0	0	0	0	0	37419.72	13951.45615	7145.236
97													65	7	0	1	1	0	1	1	0	1	0	0	0	1	1	0	1	0	1	1	1	1	0	0	1	0	1	0	0	0	1	0	903483.36	336852.0255	176281.908
97													0	0	0	0	0	0	0	0	0	0	0	0	0	0	0	0	0	0	0	0	0	0	0	0	1	0	0	0	1	0	0	0	17772.16	7185.159883	3073.28
97													0	0	0	0	0	0	0	0	0	0	0	0	0	1	0	0	1	0	0	0	0	0	0	0	1	0	0	0	1	0	0	0	22401.396	8094.766846	6163.074
97													0	0	0	0	0	0	0	0	0	0	0	0	0	0	0	0	0	0	0	0	0	0	0	0	0	0	0	0	0	0	0	1	1790.838	647.1211021	429.318
97													1	0	0	1	1	0	0	0	0	0	0	0	0	1	1	0	0	0	1	0	0	0	0	0	0	0	0	0	0	0	0	1	14777.956	5604.007807	2154.262
97													0	0	0	0	0	0	0	0	0	0	0	0	0	0	0	0	0	0	0	0	0	0	0	0	0	0	0	0	0	0	0	0	18543.78	6708.43494	3395.22
97													0	0	0	0	0	0	0	0	0	0	0	0	0	1	0	0	1	0	0	0	0	0	0	0	0	0	0	0	0	0	0	0	29710.228	8974.27147	5622.132
98	0		0	1	1.884931507	0.38630137	2	5	0	1	1	3	14	0	0	1	1	0	0	1	0	1	0	0	0	1	1	0	0	1	0	1	1	1	0	0	0	0	0	0	0	0	0	0	77527.52	31343.83364	16369.92
98													15	2	0	1	1	0	1	0	0	0	0	0	0	1	1	0	0	1	0	1	1	0	0	0	1	0	1	0	1	0	0	0	127124.48	51395.53739	25131.68
98													0	0	0	0	0	0	0	0	0	0	0	0	0	0	0	0	0	0	0	0	0	0	0	0	0	0	0	0	0	0	0	0	822.08	332.3611894	99.68
99	0		0	1	1.824657534	3	2	3	1	1	1	3	0	0	0	0	0	0	0	0	0	0	0	0	0	0	0	0	0	0	0	0	0	0	0	0	0	0	0	0	0	0	0	0	2734.02	987.940861	618.174
99													0	0	0	0	0	0	1	0	0	0	0	0	0	1	1	0	0	0	0	0	0	0	0	0	1	0	0	0	1	0	0	0	33665.778	12165.16255	9905.058
99													0	0	0	0	0	0	0	0	0	0	0	0	0	0	0	0	0	0	0	0	0	0	0	0	0	0	0	0	0	0	0	0	51896.385	18774.14003	11472.18
100	0		0	1	2.6	4.835616438	2	3	1	1	1	3	10	0	0	1	1	0	0	0	0	0	0	0	0	1	1	0	0	0	0	1	1	0	0	0	0	0	0	0	0	0	0	0	64684.278	23373.72854	14613.282
100													6	0	0	1	1	0	0	0	0	0	0	0	0	1	1	0	0	0	0	1	1	0	0	0	0	0	0	0	0	0	0	0	36361.368	13139.21669	7807.878
100													2	0	0	1	1	0	0	0	0	0	0	0	0	1	1	0	0	0	0	0	0	0	0	0	0	0	0	0	0	0	0	0	14865.908	4490.39617	2948.304
101	0		1	5	3.126027397	3.610958904	2	4	1	1	1	5	7	0	0	1	1	0	0	0	0	0	0	0	0	1	1	1	0	1	0	1	1	1	0	0	0	0	0	0	0	0	0	0	66724.776	25302.96921	11626.09
101													23	5	1	1	1	0	1	0	0	0	0	0	0	1	1	0	1	1	0	1	1	1	0	0	1	0	1	0	1	0	1	0	428179.86	162371.7974	86776.4
101													1	0	0	0	0	0	0	0	0	0	0	0	0	1	1	0	0	0	0	0	0	0	0	0	0	0	0	0	0	0	0	0	11708.945	3878.646576	1867.691
101													2	0	0	0	0	0	0	0	0	0	0	0	0	1	1	0	0	0	0	0	0	0	0	0	0	0	0	0	0	0	0	0	19372.5	5898.577545	3529.05
101													2	0	0	0	0	0	0	0	0	0	0	0	0	1	1	0	0	0	0	1	1	0	0	0	0	0	0	0	0	0	0	0	18852.75	5740.323026	3450.3
102	0		0	9	3.364383562	20.57534247	2	4	0	4	1	2	5	0	0	1	1	0	0	0	0	0	0	0	0	1	1	0	0	0	0	0	0	0	0	0	0	0	0	0	0	0	0	0	39942.112	14891.89721	7769.476
102													1	1	0	0	0	0	0	0	0	0	0	0	0	1	1	0	0	0	0	0	0	0	0	0	0	0	0	0	0	0	0	0	26536.16	10728.38373	4312
103	0		0	9	2.230136986	3.282191781	2	3	0	1	1	1	2	0	0	0	0	0	0	0	0	0	0	0	0	1	1	0	0	0	0	0	0	0	0	0	0	0	0	0	0	0	0	0	15407.7	4691.367311	2913.75
104	0		0	7	18.67671233	18.40821918	1	4	0	1	0	2	0	0	0	0	0	0	0	0	0	0	0	0	0	1	0	0	1	0	0	0	0	0	0	0	1	0	0	0	1	0	0	0	28918.496	10781.88529	5440.136
104													37	37	1	0	0	0	1	1	0	1	0	0	0	1	1	0	1	0	0	1	1	1	0	0	1	0	1	1	1	0	1	0	1416125.76	572529.7319	243025.44
105	0		0	2	1.917808219	0.616438356	3	4	0	1	1	1	233	232	1	1	1	0	1	1	0	1	1	0	0	1	1	0	1	0	1	1	1	0	0	0	1	1	1	1	1	1	1	0	7057150.24	2676170.171	1408693.67
106	0		0	11	2.742465753	1.915068493	2	4	1	1	1	1	0	0	0	1	1	0	0	0	0	0	0	0	0	1	1	0	0	0	0	0	0	0	0	0	0	0	0	0	0	0	0	0	86360.246	28607.26329	18562.106
107	0		0	1	2.060273973	4.942465753	2	3	0	1	1	3	14	1	0	1	1	0	0	0	0	0	0	0	0	1	1	0	0	0	0	1	1	0	0	0	0	0	0	0	0	0	0	0	132344.83	50187.01236	28869.924
107													0	0	0	1	1	0	0	0	0	0	0	0	0	1	1	0	0	0	0	0	0	0	0	0	0	0	0	0	0	0	0	0	24178.695	8746.933061	4621.035
107													2	0	0	1	1	0	0	1	0	1	0	0	0	0	0	0	0	0	0	1	0	1	0	0	0	0	0	0	0	0	0	0	27859.828	8415.339646	5397
108	0		0	11	1.778082192	5.430136986	2	4	1	1	1	1	0	0	0	0	0	0	0	0	0	0	0	0	0	1	1	0	0	0	0	0	0	0	0	0	0	0	0	0	0	0	0	0	48801.446	18506.19154	10920.626
109	0		0	11	2.016438356	3.950684932	2	4	0	1	1	3	1	0	0	1	1	0	0	0	0	0	0	0	0	1	1	0	0	0	0	0	0	0	0	0	0	0	0	0	0	0	0	0	13474.588	4463.524648	2073.913
109													0	0	0	0	0	0	0	0	0	0	0	0	0	0	0	0	0	0	0	0	0	0	0	0	0	0	0	0	0	0	0	0	3484.95	1061.104546	387.45
109													0	0	0	0	0	0	0	0	0	0	0	0	0	1	0	0	1	0	0	0	0	0	0	0	0	0	0	0	0	0	0	0	16661.4	5073.096395	3252.9
110	0		0	6	4.660273973	1.547945205	2	3	0	1	1	4	4	0	0	1	1	0	0	0	0	0	0	0	0	1	1	0	0	0	1	1	1	0	0	0	0	0	0	0	0	0	0	0	26354.959	8730.211944	5429.804
110													2	0	0	1	1	0	0	0	0	0	0	0	0	1	1	0	0	0	1	1	1	0	0	0	0	0	0	0	0	0	0	0	13440	4092.23808	2999.85
110													0	0	0	0	0	0	0	0	0	0	0	0	0	1	0	0	1	0	0	0	0	0	0	0	0	0	0	0	0	0	0	0	29372.7	8943.458441	5523
110													2	0	0	1	1	0	0	1	0	1	0	0	0	1	0	0	1	0	1	1	1	0	0	0	1	0	0	0	1	0	0	0	34948.2	10641.09783	7110.6
111	0		0	9	1.545205479	1.084931507	2	5	0	1	1	1	0	0	0	0	0	0	0	0	0	0	0	0	0	1	1	0	1	0	0	0	0	0	0	0	0	0	0	0	0	0	0	0	47262.842	17922.73137	9994.434
112	0		1	6	2.38630137	11.17260274	2	4	1	2	0	2	7	3	1	1	1	0	1	1	0	1	0	0	0	1	1	0	1	0	0	1	1	0	0	0	1	0	1	0	1	0	1	0	158512.48	64085.48608	29411.2
112													45	7	1	1	1	0	1	1	0	1	0	0	0	1	1	0	1	1	0	1	1	1	0	0	1	0	1	0	1	1	1	0	544967.36	220326.4889	104239.52
113	0		0	6	2.808219178	0.126027397	2	3	0	2	1	1	13	0	0	0	0	0	0	1	0	1	0	0	0	1	1	0	0	1	0	1	1	1	0	0	0	0	0	0	0	0	0	0	129643.515	46900.09727	30201.27
114	0		0	6	2.265753425	3.495890411	2	3	0	2	1	2	1	0	0	0	0	0	0	0	0	0	0	0	0	1	1	0	0	0	0	1	1	1	0	0	0	0	0	0	0	0	0	0	21441.773	7102.694515	4497.553
114													0	0	0	0	0	0	0	0	0	0	0	0	0	0	0	0	0	0	0	0	0	0	0	0	0	0	0	0	0	0	0	0	2427.108	733.1322425	310.456
115	0		0	1	3.879452055	0.128767123	2	3	0	2	1	2	7	0	0	1	1	0	0	0	0	0	0	0	0	1	1	0	0	0	0	1	1	0	0	0	0	0	0	0	0	0	0	0	44528.007	14750.12496	9743.458
115													0	0	0	0	0	0	0	0	0	0	0	0	0	0	0	0	0	0	0	0	0	0	0	0	0	0	0	0	0	0	0	0	5279.921	1749.000231	626.107
116	0		0	8	2.147945205	1.443835616	2	4	1	1	1	2	0	0	0	1	1	0	0	0	0	0	0	0	0	1	1	0	1	0	0	0	0	0	0	0	1	0	0	0	1	0	0	0	46579.597	15429.7244	9106.721
116													0	0	0	1	1	0	0	0	0	0	0	0	0	1	1	0	1	0	0	0	0	0	0	0	1	0	0	0	1	0	0	0	46579.597	15429.7244	9106.721
117	0		0	11	1.852054795	2.605479452	2	4	0	1	1	17	17	4	0	1	1	0	1	0	0	0	0	0	0	1	1	1	0	0	0	1	1	1	0	0	1	0	0	0	1	0	0	0	172802.974	65529.30698	39305.814
117													2	0	0	1	1	0	1	0	0	0	0	0	0	1	1	0	0	0	0	1	1	1	0	0	0	0	0	0	0	0	0	0	17207.046	6525.152742	3353.118
117													0	0	0	1	1	0	1	0	0	0	0	0	0	1	1	0	0	0	0	1	1	1	0	0	0	0	0	0	0	0	0	0	23005.484	8724.00161	3292.526
117													12	11	0	1	1	0	1	0	0	0	0	0	0	1	1	0	0	0	0	1	1	1	0	0	1	0	1	0	0	0	0	0	232149.592	88034.37538	46566.034
117													5	3	0	1	1	0	1	0	0	0	0	0	0	1	1	0	0	0	0	1	1	1	0	0	1	0	0	0	1	0	0	0	66370.8	24010.43335	11562.705
117													5	3	0	1	1	0	1	0	0	0	0	0	0	1	1	0	0	0	0	1	1	1	0	0	1	0	0	0	1	0	0	0	66370.8	24010.43335	12448.785
117													14	9	0	1	1	0	1	1	0	1	0	0	0	1	1	0	1	0	0	1	1	1	0	0	1	0	1	0	1	0	1	0	365394.045	132185.6805	65273.85
117													2	0	0	1	1	0	0	1	0	1	0	0	0	1	1	0	0	0	0	1	1	1	0	0	0	0	0	0	0	0	0	0	27428.01	9922.411754	4039.545
117													7	0	0	1	1	0	1	1	0	1	0	0	0	1	1	0	0	0	0	1	1	1	0	0	0	0	0	0	0	0	0	0	47949.495	17346.30521	10574.385
117													6	0	0	1	1	0	1	1	0	1	0	0	0	1	1	0	0	0	0	1	1	1	0	0	0	0	0	0	0	0	0	0	58593.105	21196.75885	9985.44
117													3	0	0	1	1	0	1	1	0	1	0	0	0	1	1	0	0	0	0	1	1	1	0	0	0	0	0	0	0	0	0	0	33140.67	11989.03506	6856.47
117													0	0	0	1	1	0	1	1	0	1	0	0	0	1	1	0	0	0	0	0	0	0	0	0	0	0	0	0	0	0	0	0	17504.421	5798.426978	2758.485
117													1	0	0	1	1	0	1	1	0	1	0	0	0	1	1	0	0	0	0	0	0	0	0	0	0	0	0	0	0	0	0	0	11104.098	3678.287983	2016.511
117													0	0	0	0	0	0	0	0	0	0	0	0	0	0	0	0	0	0	0	0	0	0	0	0	0	0	0	0	0	0	0	0	1599.815	529.9467178	189.214
117													0	0	0	1	1	0	1	1	0	1	0	0	0	1	1	0	0	0	0	0	0	0	0	0	0	0	0	0	0	0	0	0	20951.73	6940.365321	3541.916
117													2	0	0	1	1	0	1	1	0	1	0	0	0	1	1	0	1	0	0	0	0	0	0	0	0	0	0	0	0	0	0	0	36148.35	11006.5219	8170.05
117													0	0	0	1	1	0	1	1	0	1	0	0	0	1	1	0	0	0	0	0	0	0	0	0	0	0	0	0	0	0	0	0	24000.9	7307.842034	4824.75
118	0		0	6	6.120547945	1.504109589	2	3	0	2	0	2	9	2	0	1	1	0	0	0	0	0	0	0	0	1	1	0	0	0	0	1	1	0	0	0	0	0	0	0	0	0	0	0	62688.299	20765.81249	14057.112
118													16	0	0	1	1	0	0	0	0	0	0	0	0	1	1	0	0	0	0	1	1	0	0	0	0	0	0	0	0	0	0	0	104085.771	34478.93207	23247.81
119	0		0	1	2.460273973	1.61369863	2	3	1	2	1	2	3	1	0	0	0	0	0	0	0	0	0	0	0	1	1	0	1	0	0	0	0	0	0	0	0	0	0	0	0	0	0	0	51931.53	18786.85416	8315.52
119													0	0	0	0	0	0	0	0	0	0	0	0	0	1	1	0	0	0	0	0	0	0	0	0	0	0	0	0	0	0	0	0	61501.991	20372.84203	12852.733
120	0		1	6	2.397260274	1.194520548	2	4	1	3	1	2	0	0	0	1	1	0	0	0	0	0	0	0	0	1	1	0	0	0	0	1	1	0	0	0	0	0	0	0	0	0	0	0	10236.78	3703.278006	1587.915
120													1	0	0	1	1	0	0	0	0	0	0	0	0	1	1	0	0	0	0	0	0	0	0	0	0	0	0	0	0	0	0	0	23473.166	7775.603603	3439.868
121	0		0	7	2.115068493	2.931506849	2	5	0	1	1	1	0	0	0	1	1	0	0	1	0	1	0	0	0	1	0	0	1	0	0	0	0	0	0	0	1	0	0	0	1	0	0	0	29242.5	8903.814885	5408.55
122	0		0	9	1.534246575	2.898630137	2	4	0	1	1	4	2	0	0	0	0	0	0	0	0	0	0	0	0	1	1	0	0	0	1	1	1	0	0	0	0	0	0	0	0	0	0	0	17292.524	6557.567196	3195.146
122													2	0	0	0	0	0	0	0	0	0	0	0	0	1	1	0	0	0	1	1	1	0	0	0	0	0	0	0	0	0	0	0	18433.02	6668.366181	3240.795
122													0	0	0	0	0	0	0	0	0	0	0	0	0	0	0	0	0	0	0	0	0	0	0	0	0	0	0	0	0	0	0	0	24540.418	8129.136165	4035.148
122													2	0	0	0	0	0	0	0	0	0	0	0	0	1	1	0	1	0	0	0	0	0	0	0	0	0	0	0	0	0	0	0	73102.05	22258.25839	15882.3
123	0		0	8	3.071232877	2.432876712	2	5	0	1	1	2	0	0	0	0	0	0	0	0	0	0	0	0	0	1	0	0	1	0	0	0	0	0	0	0	0	0	0	0	0	0	0	0	29385.3	8947.294915	5534.55
123													0	0	0	0	0	0	0	0	0	0	0	0	0	0	0	0	0	0	0	0	0	0	0	0	0	0	0	0	0	0	0	0	5420.644	1637.359727	706.236
124	0		0	11	3.106849315	1.030136986	2	3	0	1	1	1	0	0	0	1	1	0	0	0	0	0	0	0	0	1	1	0	0	0	0	0	0	0	0	0	0	0	0	0	0	0	0	0	79202.004	26236.05984	17324.774
125	0		0	11	2.57260274	2.528767123	2	5	0	1	1	2	0	0	0	1	0	1	1	0	0	0	0	0	0	1	0	0	1	0	0	1	0	1	0	0	1	0	0	0	1	0	0	0	25270.35	7694.366709	4818.45
125													0	0	0	0	0	0	0	0	0	0	0	0	0	1	1	0	1	0	0	1	0	1	0	0	0	0	0	0	0	0	0	0	30258.152	9139.777393	5481.296
126	0		0	6	2.830136986	2.419178082	2	3	0	1	1	2	0	0	0	0	0	0	0	0	0	0	0	0	0	0	0	0	0	0	0	0	0	0	0	0	0	0	0	0	0	0	0	0	2254.35	686.4089967	294
126													0	0	0	0	0	0	0	0	0	0	0	0	0	0	0	0	0	0	0	0	0	0	0	0	0	0	0	0	0	0	0	0	3615.476	1092.090681	432.788
127	0		0	9	2.073972603	1.764383562	2	4	1	1		2	0	0	0	1	1	0	0	0	0	0	0	0	0	1	0	0	1	0	0	0	0	0	0	0	0	0	0	0	0	0	0	0	28352.336	9391.853062	5462.757
127													1	0	0	1	1	0	1	1	0	1	0	0	0	1	0	0	1	0	0	0	0	0	0	0	1	0	1	0	0	0	0	0	40157.25	12227.15979	8259.3
128	0		0	6	2.684931507	0.682191781	2	4	1	1	1	1	7	1	0	0	0	0	0	0	0	0	0	0	0	1	1	0	0	0	0	0	0	0	0	0	1	0	0	0	1	0	0	0	112564.2	34273.77274	23061.15
129	0		0	9	2.709589041	1.268493151	2	4	1	2	1	1	0	0	0	0	0	0	0	0	0	0	0	0	0	1	1	0	1	0	0	0	0	0	0	0	1	0	0	0	1	0	0	0	40450.2	12316.3578	7671.3
130	0		0	11	3.487671233	1.164383562	2	4	0	2	1	1	4	0	0	0	0	0	0	0	0	0	0	0	0	1	0	0	1	0	0	0	0	0	0	0	0	0	0	0	0	0	0	0	80059.612	24182.8064	15658.496
131	0		1	6	5.904109589	3.567123288	2	5	1	1	1	1	0	0	0	0	0	0	0	0	0	0	0	0	0	1	0	0	1	0	0	0	0	0	0	0	0	0	0	0	0	0	0	0	44426.55	13527.0848	8002.05
132	0		0	11	3.419178082	4.482191781	2	4	1	4	1	2	5	0	0	1	1	0	0	0	0	0	0	0	0	1	1	0	0	0	0	1	1	0	0	0	1	0	0	0	1	0	0	0	73221.566	24255.00985	12947.34
132													4	0	0	1	1	0	0	0	0	0	0	0	0	1	1	0	0	0	0	1	1	0	0	0	0	0	0	0	0	0	0	0	39953.918	13234.93511	8275.455
133	0		0	6	2.24109589	1.326027397	2	3	0	1	1	3	0	0	0	1	1	0	0	0	0	0	0	0	0	1	1	0	0	0	0	1	0	1	0	0	0	0	0	0	0	0	0	0	16292.601	5397.005544	3253.843
133													2	0	1	1	1	0	0	0	0	0	0	0	0	1	1	0	0	0	0	1	1	1	0	0	0	0	0	0	0	0	0	0	27720	8440.24104	4059.3
133													2	0	0	1	1	0	0	0	0	0	0	0	0	1	1	0	1	0	0	1	1	1	0	0	0	0	0	0	0	0	0	0	62860.35	19139.84509	12046.65
134	0		0	10	1.726027397	0.139726027	2	4	0	1	1	1	1	0	0	0	0	0	0	0	0	0	0	0	0	1	1	0	0	0	1	0	0	0	0	0	0	0	0	0	0	0	0	0	4511.372	1494.414532	1112.961
135	0		0	2	2.284931507	0.304109589	1	4	0	1	1	2	3	0	0	1	1	0	0	0	0	0	0	0	0	1	1	0	0	0	0	1	1	1	0	0	0	0	0	0	0	0	0	0	18792.176	7126.25623	3903.856
135													16	16	1	0	0	0	1	1	0	1	0	0	0	1	1	0	0	0	0	1	1	1	0	0	1	0	1	0	1	0	1	0	325039.065	117586.7822	65080.02
136	0		0	1	1.945205479	0.893150685	2	4	0	1	1	2	4	0	0	1	1	0	0	0	0	0	0	0	0	1	1	0	0	0	0	1	1	0	0	0	0	0	0	0	0	0	0	0	32186.577	10661.96456	6306.779
136													4	2	0	1	1	0	0	0	0	0	0	0	0	0	0	0	0	0	0	1	1	0	0	0	0	0	0	0	0	0	0	0	72776.55	22159.1495	13431.6
137	0		0	9	2.147945205	0.57260274	2	3	0	2	1	2	0	0	0	0	0	0	0	0	0	0	0	0	0	0	0	0	0	0	0	0	0	0	0	0	0	0	0	0	0	0	0	0	7810.95	2378.293678	967.05
137													0	0	0	0	0	0	0	0	0	0	0	0	0	1	1	0	0	1	0	1	1	1	0	0	0	0	0	0	0	0	0	0	20409.9	6214.447172	3785.25
138	0		0	10	3.495890411	0.717808219	2	5	0	1	1	1	64	2	1	1	1	0	1	1	0	1	1	0	1	1	1	0	1	0	0	1	1	1	0	0	1	0	1	0	1	0	0	0	537514	160787.1003	$115,257
139	0		0	9	2.690410959	1.197260274	2	3	1	1		1	0	0	0	0	0	0	0	0	0	0	0	0	0	1	0	0	1	0	0	0	0	0	0	0	0	0	0	0	0	0	0	0	56919.332	17193.05342	12145.82
140	0		0	1	2.128767123	0.408219178	2	4	0	1	1	1	0	0	0	1	1	0	0	0	0	0	0	0	0	1	1	1	1	0	0	0	0	0	0	0	0	0	0	0	0	0	0	0	20835.15	6343.928142	3991.05
141	0		0	1	2.969863014	1.320547945	2	5	0	1	1	2	6	0	0	0	0	0	0	0	0	0	0	0	0	1	1	0	0	1	0	0	0	0	0	0	1	0	0	0	1	0	0	0	108917.106	36079.33595	23782.499
141													0	0	0	0	0	0	0	0	0	0	0	0	0	1	1	0	0	1	0	0	0	0	0	0	0	0	0	0	0	0	0	0	13299.3	4049.397463	2542.05
142	0		0	5	6.490410959	2.619178082	2	3	1	2	0	1	0	0	0	0	0	0	0	1	0	1	0	0	0	1	1	0	1	0	0	0	0	0	0	0	0	0	0	0	0	0	0	0	27399.75	8342.73068	5108.25
143	0		0	11	2.668493151	0.243835616	2		0	2	1	1	0	0	0	0	0	0	0	0	0	0	0	0	0	0	0	0	0	0	0	0	0	0	0	0	0	0	0	0	0	0	0	0	4040.04	1220.334482	511.944
144	0		0	6	1.263013699	0.139726027	2	4	0	1	1	1	0	0	0	0	0	0	0	0	0	0	0	0	0	1	0	0	1	0	0	0	0	0	0	0	1	0	1	0	0	0	0	0	31449.6	9575.837107	5841.15
145	0		0	11	3.202739726	2.2	2	5	0	1	1	3	15	4	0	0	0	0	1	0	0	0	0	0	0	1	0	1	0	0	0	1	1	0	0	0	1	0	0	0	1	0	0	0	186220.592	61686.5022	35603.059
145													3	0	0	0	0	0	0	0	0	0	0	0	0	1	0	0	1	1	0	1	1	0	0	0	0	0	0	0	0	0	0	0	83119.968	25107.21753	16543.604
145													3	0	0	0	0	0	0	0	0	0	0	0	0	0	0	0	0	0	0	1	1	0	0	0	0	0	0	0	0	0	0	0	19949.368	6025.906098	4233.304
146	0		1	10	1.430136986	0.536986301	2	4	1	2	0	1	13	1	0	0	0	0	0	1	0	1	0	1	0	1	1	0	0	0	0	0	0	0	0	0	0	0	0	0	0	0	0	0	124077	37115.27709	26802
147	0		1	7	3.356164384	0.531506849	2	5	1	2	0	1	10	0	0	0	0	0	0	0	0	0	0	0	0	1	1	0	0	0	0	1	1	0	0	0	0	0	0	0	0	0	0	0	81737.308	24689.57125	17296.1
